# Supplementary material for: Tandocyclinones A and B, Ether Bridged C-Glycosyl Benz[a]anthracenes from an Intertidal Zone Streptomyces sp
Source: MDPI journal article supplement (doi:10.3390/md21090500), 2023-09-21

## *Supplementary Materials*

# Tandocyclinones A and B, Ether Bridged C-GlycosylBenz[*a*]anthracenes from an Intertidal Zone *Streptomyces* sp.

Thanh-Hau Huynh <sup>1</sup>, Eun Seo Bae <sup>1</sup>, Bo Eun Heo <sup>2</sup>, Jayho Lee <sup>3</sup>, Joon Soo An <sup>1</sup>, Yun Kwon <sup>4</sup>, Sang-Jip Nam <sup>5</sup>, Ki-Bong Oh <sup>3</sup>, Jichan Jang <sup>2</sup>, Sang Kook Lee <sup>1</sup> and Dong-Chan Oh <sup>1,\*</sup>

<sup>1</sup> Natural Products Research Institute, College of Pharmacy, Seoul National University, Seoul 08826, Republic of Korea; 2019-22632@snu.ac.kr (T.-H.H.); ddol1289@snu.ac.kr (E.S.B.); ahnjunsoo@snu.ac.kr (J.S.A.); sklee61@snu.ac.kr (S.K.L.)

<sup>2</sup> Division of Life Science, Department of Bio & Medical Big Data (BK21 Four Program), Research Institute of Life Science, Gyeongsang National University, Jinju 52828, Republic of Korea; hbo0113@naver.com (B.E.H.); jichanjang@gnu.ac.kr (J.J.)

<sup>3</sup> Department of Agricultural Biotechnology, College of Agriculture and Life Sciences and Natural Products Research Institute, Seoul National University, Seoul 08826, Republic of Korea; jayho@snu.ac.kr (J.L.); ohkibong@snu.ac.kr (K.-B.O.)

<sup>4</sup> Research Institute of Pharmaceutical Sciences, College of Pharmacy, Kyungpook National University, Daegu 41566, Republic of Korea; yunkwon@knu.ac.kr

<sup>5</sup> Department of Chemistry and Nanoscience, Ewha Womans University, Seoul 03760, Republic of Korea; sjnam@ewha.ac.kr

\* Correspondence: dongchanoh@snu.ac.kr; Tel.: +82-880-2491; Fax: +82-762-8322

## Table of contents

|     |                                                                                                                                                                                                                                    |
|-----|------------------------------------------------------------------------------------------------------------------------------------------------------------------------------------------------------------------------------------|
| S3  | <b>Figure S1.</b> Comparison of $^1\text{H}$ NMR spectra of tandocyclinone A ( <b>1</b> ) in various solvents (pyridine- $d_5$ , acetone- $d_6$ , DMSO- $d_6$ , $\text{CD}_3\text{CN}$ , THF- $d_8$ , and $\text{CD}_3\text{OD}$ ) |
| S4  | <b>Figure S2.</b> $^1\text{H}$ NMR spectrum of tandocyclinone A ( <b>1</b> ) at 800 MHz in THF- $d_8$                                                                                                                              |
| S5  | <b>Figure S3.</b> $^{13}\text{C}$ NMR spectrum of tandocyclinone A ( <b>1</b> ) at 200 MHz in THF- $d_8$                                                                                                                           |
| S6  | <b>Figure S4.</b> COSY NMR spectrum of tandocyclinone A ( <b>1</b> ) at 800 MHz in THF- $d_8$                                                                                                                                      |
| S6  | <b>Figure S5.</b> HSQC NMR spectrum of tandocyclinone A ( <b>1</b> ) at 800 MHz in THF- $d_8$                                                                                                                                      |
| S7  | <b>Figure S6.</b> $^1\text{H}$ - $^{15}\text{N}$ HSQC NMR spectrum of tandocyclinone A ( <b>1</b> ) at 800 MHz in THF- $d_8$                                                                                                       |
| S7  | <b>Figure S7.</b> HMBC NMR spectrum of tandocyclinone A ( <b>1</b> ) at 800 MHz in THF- $d_8$                                                                                                                                      |
| S8  | <b>Figure S8.</b> ROESY NMR spectrum of tandocyclinone A ( <b>1</b> ) at 800 MHz in THF- $d_8$                                                                                                                                     |
| S9  | <b>Figure S9.</b> $^1\text{H}$ NMR spectrum of tandocyclinone B ( <b>2</b> ) at 800 MHz in THF- $d_8$                                                                                                                              |
| S10 | <b>Figure S10.</b> $^{13}\text{C}$ NMR spectrum of tandocyclinone B ( <b>2</b> ) at 200 MHz in THF- $d_8$                                                                                                                          |
| S11 | <b>Figure S11.</b> COSY NMR spectrum of tandocyclinone B ( <b>2</b> ) at 800 MHz in THF- $d_8$                                                                                                                                     |
| S11 | <b>Figure S12.</b> HSQC NMR spectrum of tandocyclinone B ( <b>2</b> ) at 800 MHz in THF- $d_8$                                                                                                                                     |
| S12 | <b>Figure S13.</b> HMBC NMR spectrum of tandocyclinone B ( <b>2</b> ) at 800 MHz in THF- $d_8$                                                                                                                                     |
| S12 | <b>Figure S14.</b> ROESY NMR spectrum of tandocyclinone B ( <b>2</b> ) at 800 MHz in THF- $d_8$                                                                                                                                    |
| S13 | <b>Figure S15.</b> $^1\text{H}$ NMR spectrum of tandocyclinone B ( <b>2</b> ) at 400 MHz in $\text{CD}_3\text{OD}$                                                                                                                 |
| S14 | <b>Figure S16.</b> $^1\text{H}$ NMR spectrum of acetylation product of tandocyclinone B ( <b>2</b> ) at 400 MHz in $\text{CD}_3\text{OD}$                                                                                          |
| S15 | <b>Figure S17.</b> $^1\text{H}$ NMR spectrum of tandocyclinone A ( <b>1</b> ) at 400 MHz in $\text{CD}_3\text{OD}$                                                                                                                 |
| S16 | <b>Figure S18.</b> Comparison of $^1\text{H}$ NMR spectra of <b>2</b> , acetylation product of <b>2</b> , and <b>1</b> in $\text{CD}_3\text{OD}$                                                                                   |
| S17 | <b>Figure S19.</b> $^1\text{H}$ NMR spectrum of ( <i>S</i> )-MTPA amide ( <b>2a</b> ) of tandocyclinone B ( <b>2</b> ) at 800 MHz in $\text{CD}_3\text{OD}$                                                                        |
| S18 | <b>Figure S20.</b> COSY NMR spectrum of ( <i>S</i> )-MTPA amide ( <b>2a</b> ) of tandocyclinone B ( <b>2</b> ) at 800 MHz in $\text{CD}_3\text{OD}$                                                                                |
| S18 | <b>Figure S21.</b> HSQC NMR spectrum of ( <i>S</i> )-MTPA amide ( <b>2a</b> ) of tandocyclinone B ( <b>2</b> ) at 800 MHz in $\text{CD}_3\text{OD}$                                                                                |
| S19 | <b>Figure S22.</b> HMBC NMR spectrum of ( <i>S</i> )-MTPA amide ( <b>2a</b> ) of tandocyclinone B ( <b>2</b> ) at 800 MHz in $\text{CD}_3\text{OD}$                                                                                |
| S20 | <b>Figure S23.</b> $^1\text{H}$ NMR spectrum of ( <i>R</i> )-MTPA amide ( <b>2b</b> ) of tandocyclinone B ( <b>2</b> ) at 800 MHz in $\text{CD}_3\text{OD}$                                                                        |
| S21 | <b>Figure S24.</b> COSY NMR spectrum of ( <i>R</i> )-MTPA amide ( <b>2b</b> ) of tandocyclinone B ( <b>2</b> ) at 800 MHz in $\text{CD}_3\text{OD}$                                                                                |
| S21 | <b>Figure S25.</b> HSQC NMR spectrum of ( <i>R</i> )-MTPA amide ( <b>2b</b> ) of tandocyclinone B ( <b>2</b> ) at 800 MHz in $\text{CD}_3\text{OD}$                                                                                |
| S22 | <b>Figure S26.</b> HMBC NMR spectrum of ( <i>R</i> )-MTPA amide ( <b>2b</b> ) of tandocyclinone B ( <b>2</b> ) at 800 MHz in $\text{CD}_3\text{OD}$                                                                                |
| S23 | <b>Figure S27.</b> Liquid chromatography profiles of tandocyclinone B ( <b>2</b> ), acetylation product of <b>2</b> , and tandocyclinone A ( <b>1</b> )                                                                            |
| S23 | <b>Figure S28.</b> CD spectra for tandocyclinones A ( <b>1</b> , red), and B ( <b>2</b> , blue)                                                                                                                                    |
| S24 | <b>Figure S29.</b> IR spectrum of tandocyclinone A ( <b>1</b> )                                                                                                                                                                    |
| S25 | <b>Figure S30.</b> IR spectrum of tandocyclinone B ( <b>2</b> )                                                                                                                                                                    |
| S26 | <b>Figure S31.</b> HR-ESI-MS data of tandocyclinone A ( <b>1</b> )                                                                                                                                                                 |

S26 **Figure S32.** HR-ESI-MS data of tandocyclinone B (**2**)

S27 **Figure S33.** HR-ESI-MS data of (*S*)-MTPA amide (**2a**) of tandocyclinone B (**2**)

S27 **Figure S34.** HR-ESI-MS data of (*R*)-MTPA amide (**2b**) of tandocyclinone B (**2**)

S28 **Figure S35.** The simulated models of two possible diastereomers **1A** (4*S*,4*aR*,6*aS*,12*aS*,12*bS*,1'*R*,4'*S*,5'*R*) and **1B** (4*R*,4*aS*,6*aR*,12*aR*,12*bR*,1'*R*,4'*S*,5'*R*) of tandocyclinone A (**1**)

S28 **Table S1.** Energy analysis for diastereomers **1A** (4*S*,4*aR*,6*aS*,12*aS*,12*bS*,1'*R*,4'*S*,5'*R*) and **1B** (4*R*,4*aS*,6*aR*,12*aR*,12*bR*,1'*R*,4'*S*,5'*R*) of tandocyclinone A (**1**)

S29 **Table S2.** ECD calculation of conformer 1 of diastereomer **1A**

S30 **Table S3.** ECD calculation of conformer 2 of diastereomer **1A**

S31 **Table S4.** ECD calculation of conformer 3 of diastereomer **1A**

S32 **Table S5.** ECD calculation of conformer 1 of diastereomer **1B**

S33 **Table S6.** ECD calculation of conformer 2 of diastereomer **2B**

S34 **Table S7.** ECD calculation of conformer 3 of diastereomer **2B**

S35 **Figure S36.** The proposed polyketide cyclization patterns of (a) tandocyclinones and (b) angucyclinones

S36 Proposed biosynthetic pathways of tandocyclinones A and B (**1** and **2**)

S36 **Scheme S1.** Proposed biosynthetic pathways of tandocyclinones A and B (**1** and **2**)

S37 **Figure S37.** <sup>1</sup>H NMR (600 MHz, DMSO-*d*<sub>6</sub>) and UV-vis (inset) spectra of BE-54238A (mass 397) from reference

S37 **Figure S38.** <sup>1</sup>H NMR (800 MHz, DMSO-*d*<sub>6</sub>), UV-vis (inset) and MS (positive mode, inset) spectra of TDH03.397

**Figure S1.** Comparison of  $^1\text{H}$  NMR spectra of tandocyclinone A (**1**) in various solvents (pyridine- $d_5$ , acetone- $d_6$ , DMSO- $d_6$ ,  $\text{CD}_3\text{CN}$ , THF- $d_8$ , and  $\text{CD}_3\text{OD}$ )

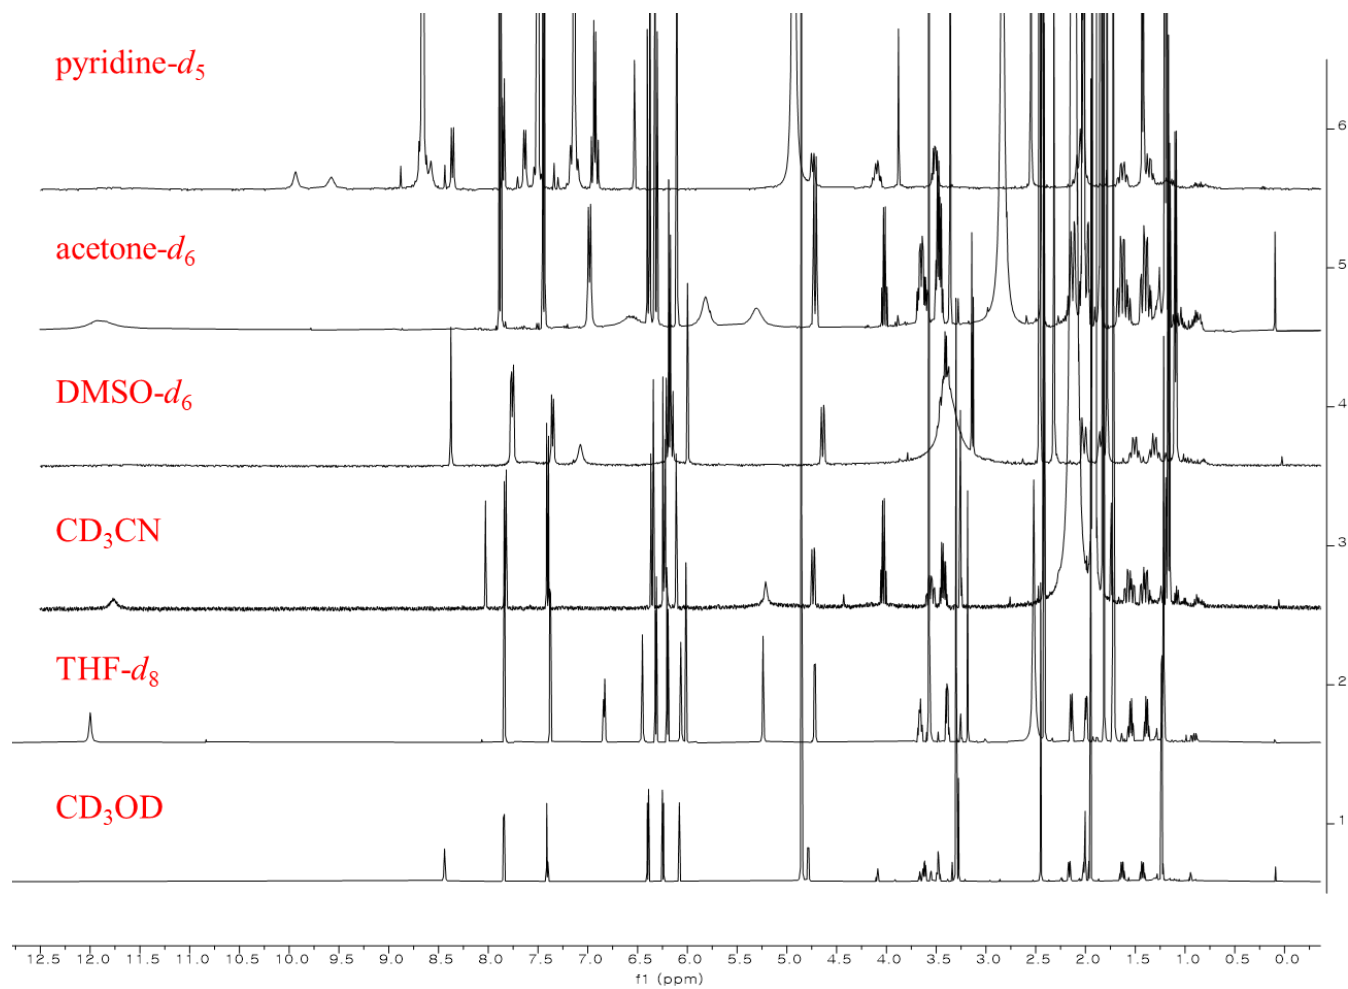

**Figure S2.**  $^1\text{H}$  NMR spectrum of tandocyclinone A (**1**) at 800 MHz in  $\text{THF-}d_8$ .

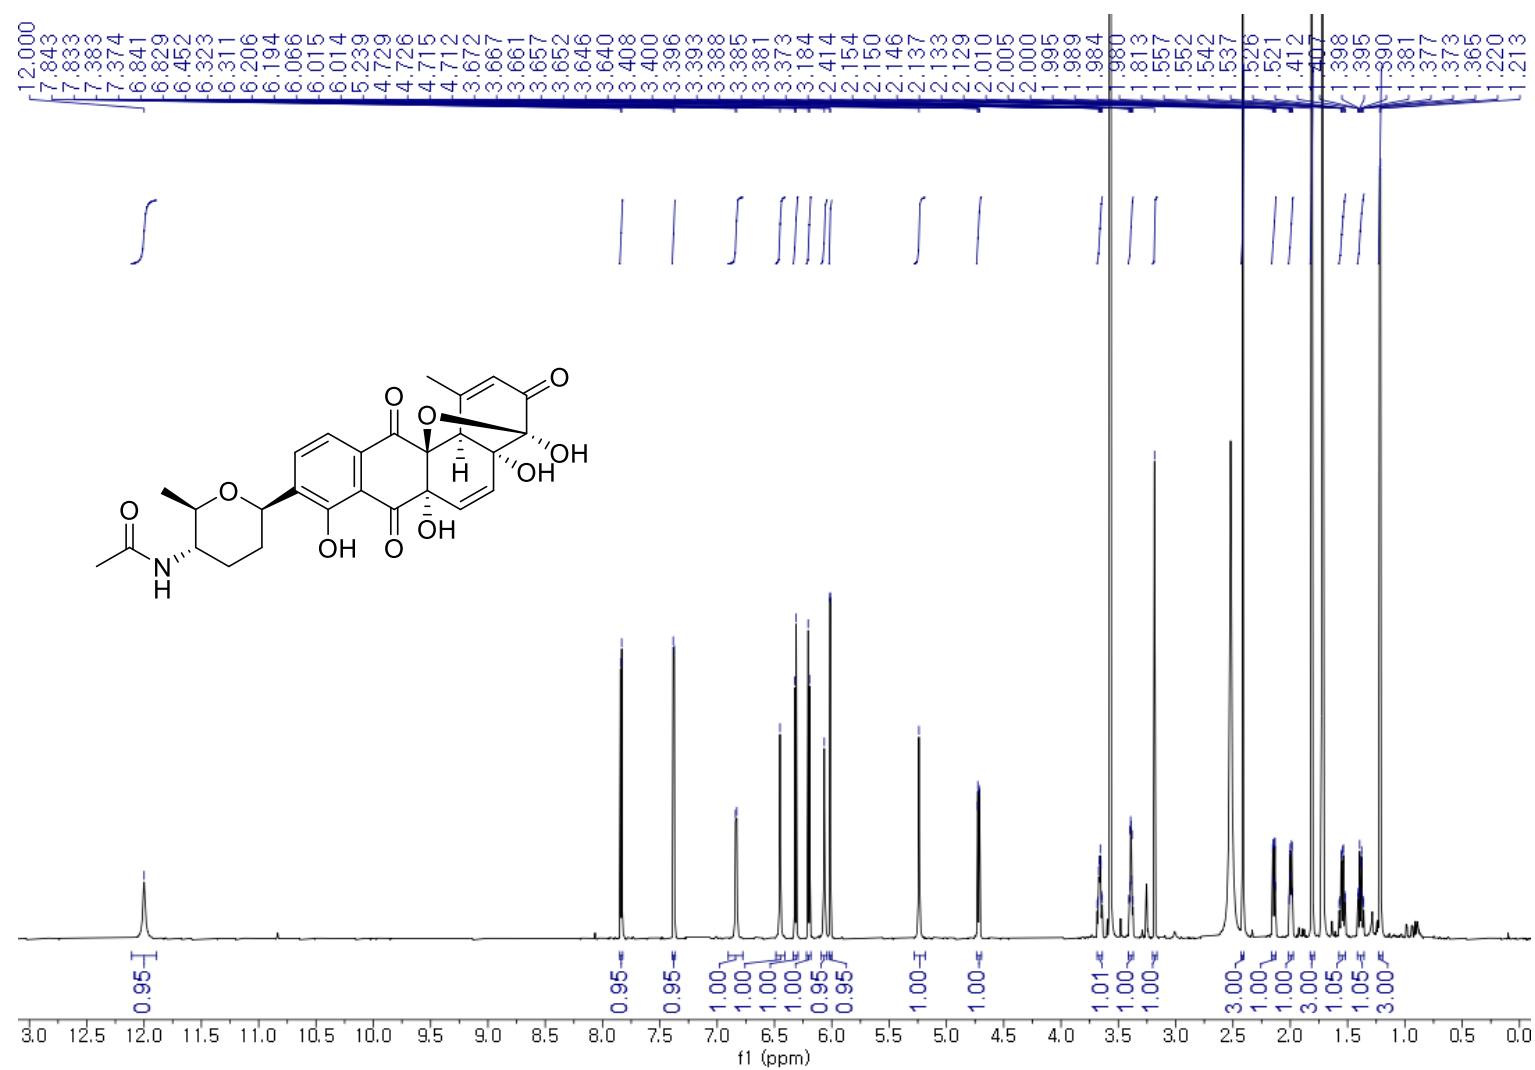

**Figure S3.**  $^{13}\text{C}$  NMR spectrum of tandocyclinone A (**1**) at 200 MHz in  $\text{THF-}d_8$ .

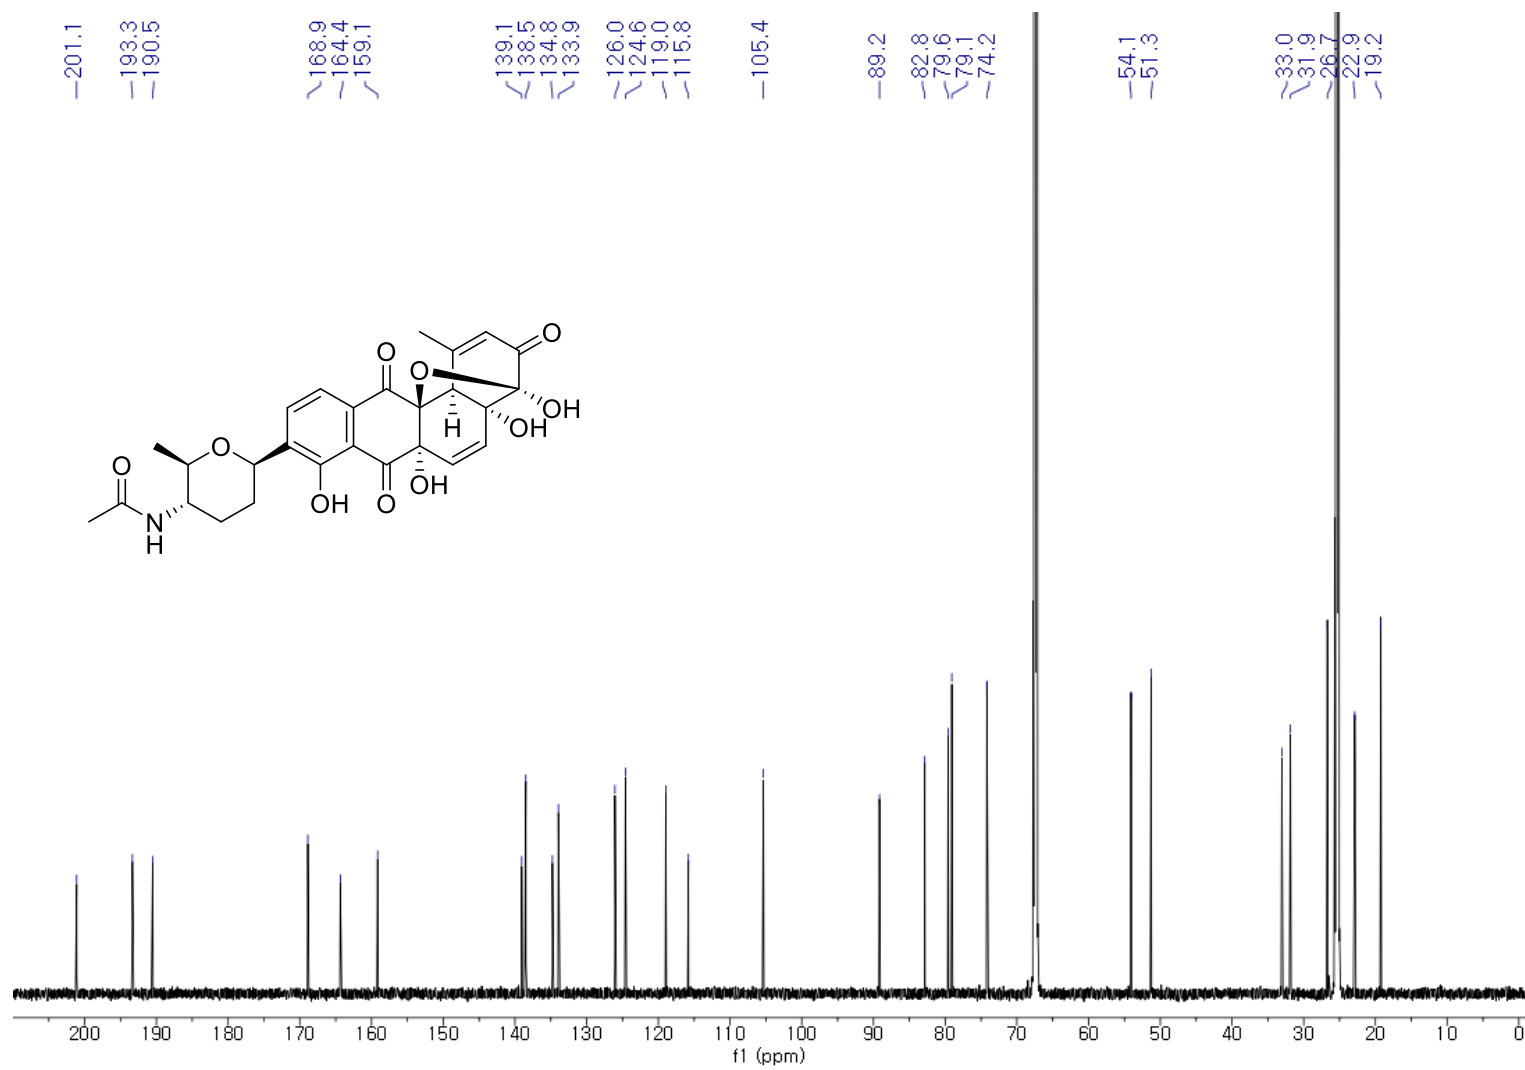

**Figure S4.** COSY NMR spectrum of tandocyclinone A (**1**) at 800 MHz in THF- $d_8$ .

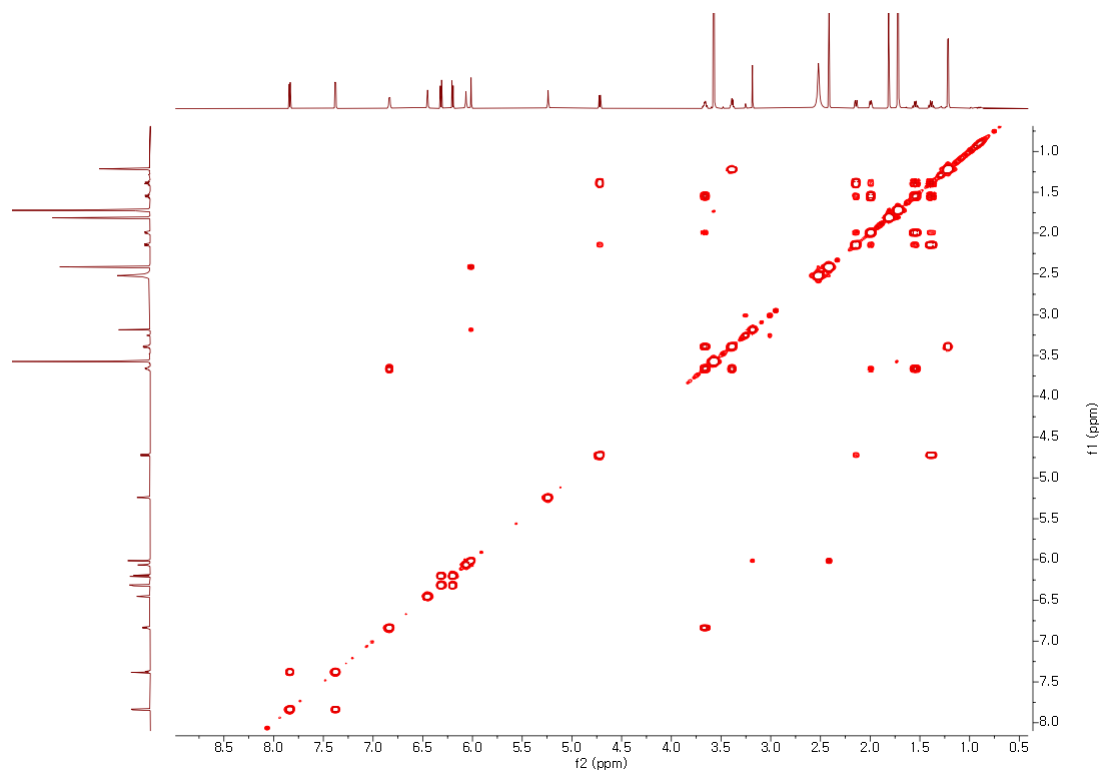

**Figure S5.** HSQC NMR spectrum of tandocyclinone A (**1**) at 800 MHz in THF- $d_8$ .

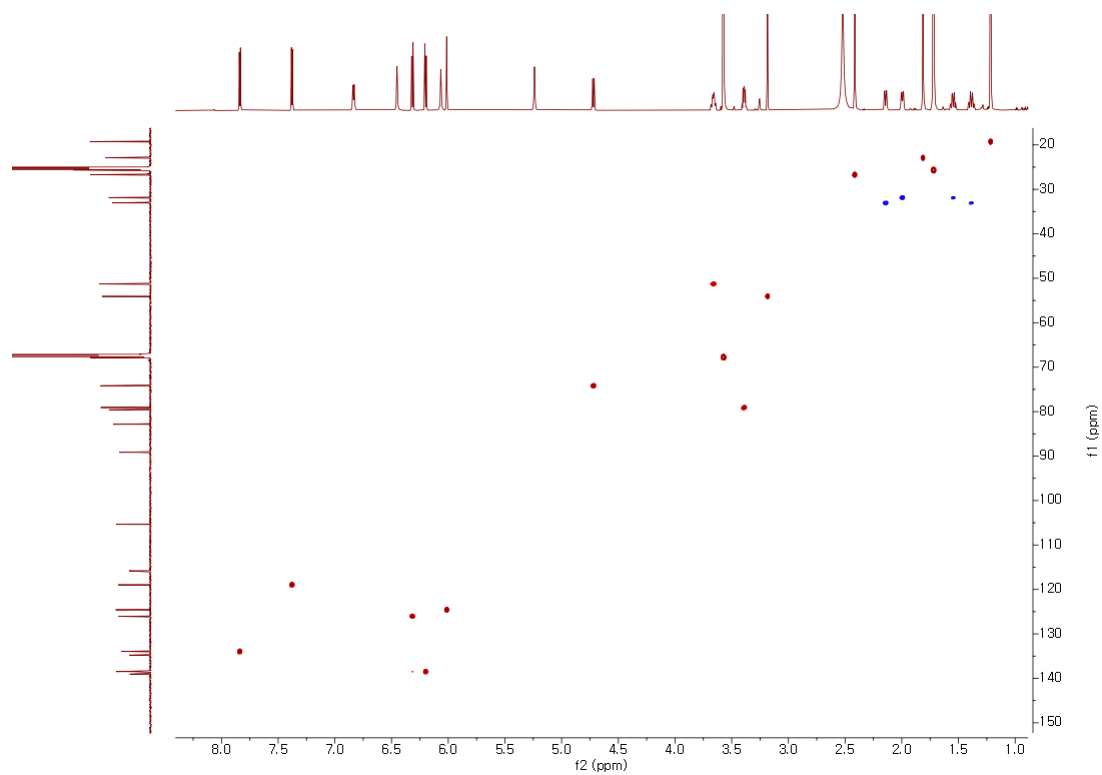

**Figure S6.**  $^1\text{H}$ - $^{15}\text{N}$  HSQC NMR spectrum of tandocyclinone A (**1**) at 800 MHz in  $\text{THF-}d_8$ .

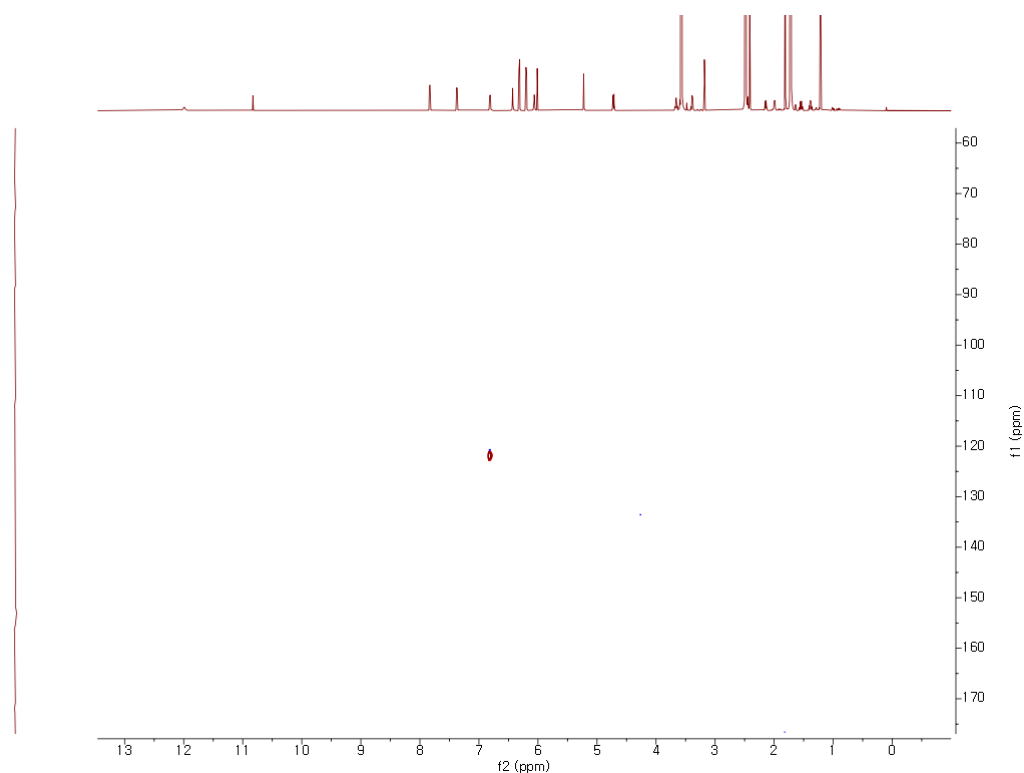

**Figure S7.** HMBC NMR spectrum of tandocyclinone A (**1**) at 800 MHz in  $\text{THF-}d_8$ .

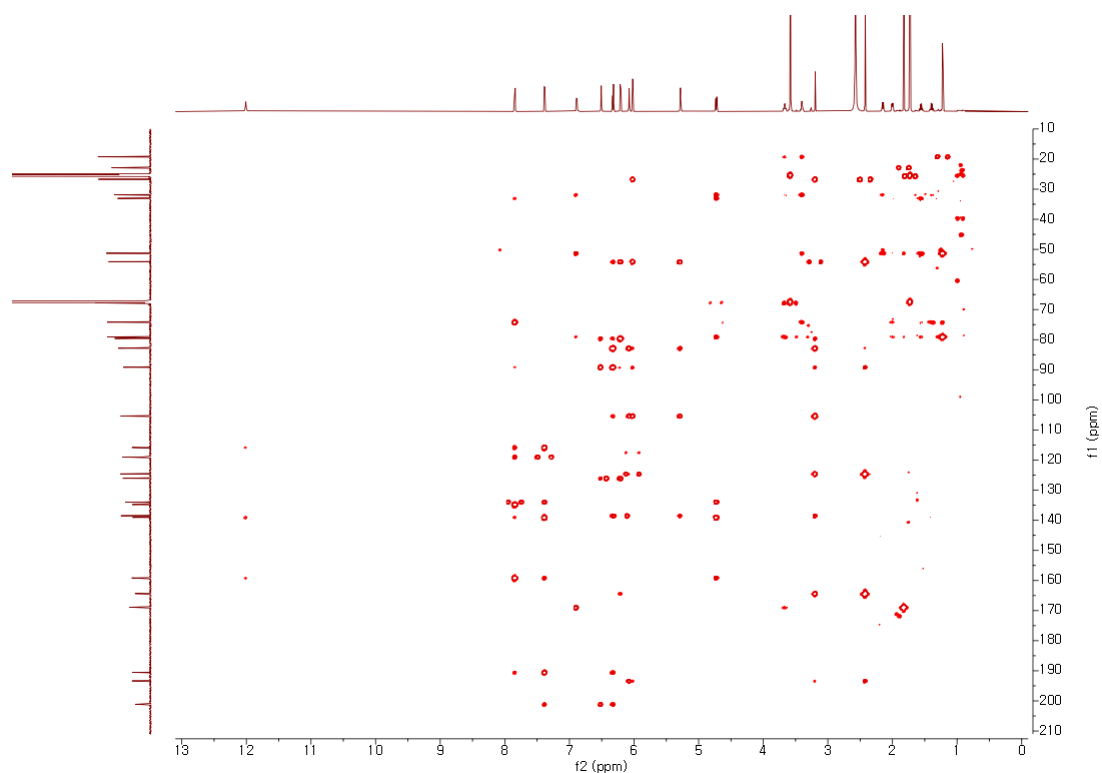



**Figure S8.** ROESY NMR spectrum of tandocyclinone A (**1**) at 800 MHz in THF-*d*<sub>8</sub>.

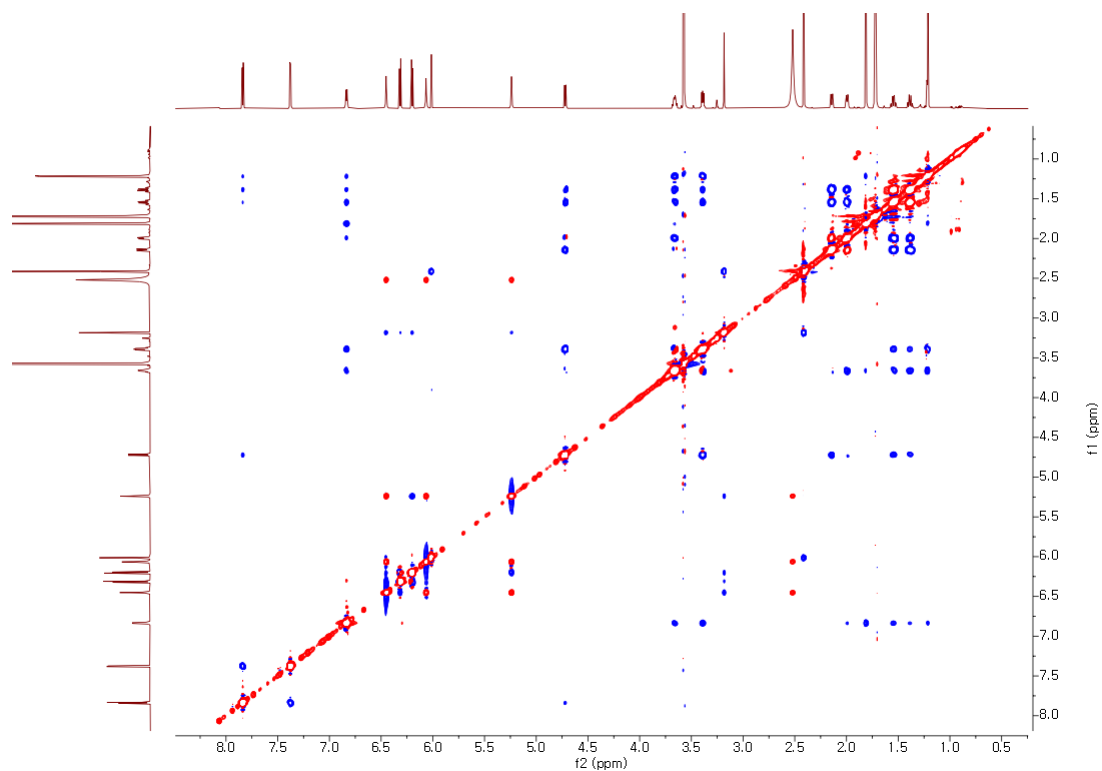

**Figure S9.**  $^1\text{H}$  NMR spectrum of tandocyclinone B (**2**) at 800 MHz in  $\text{THF-}d_8$ .

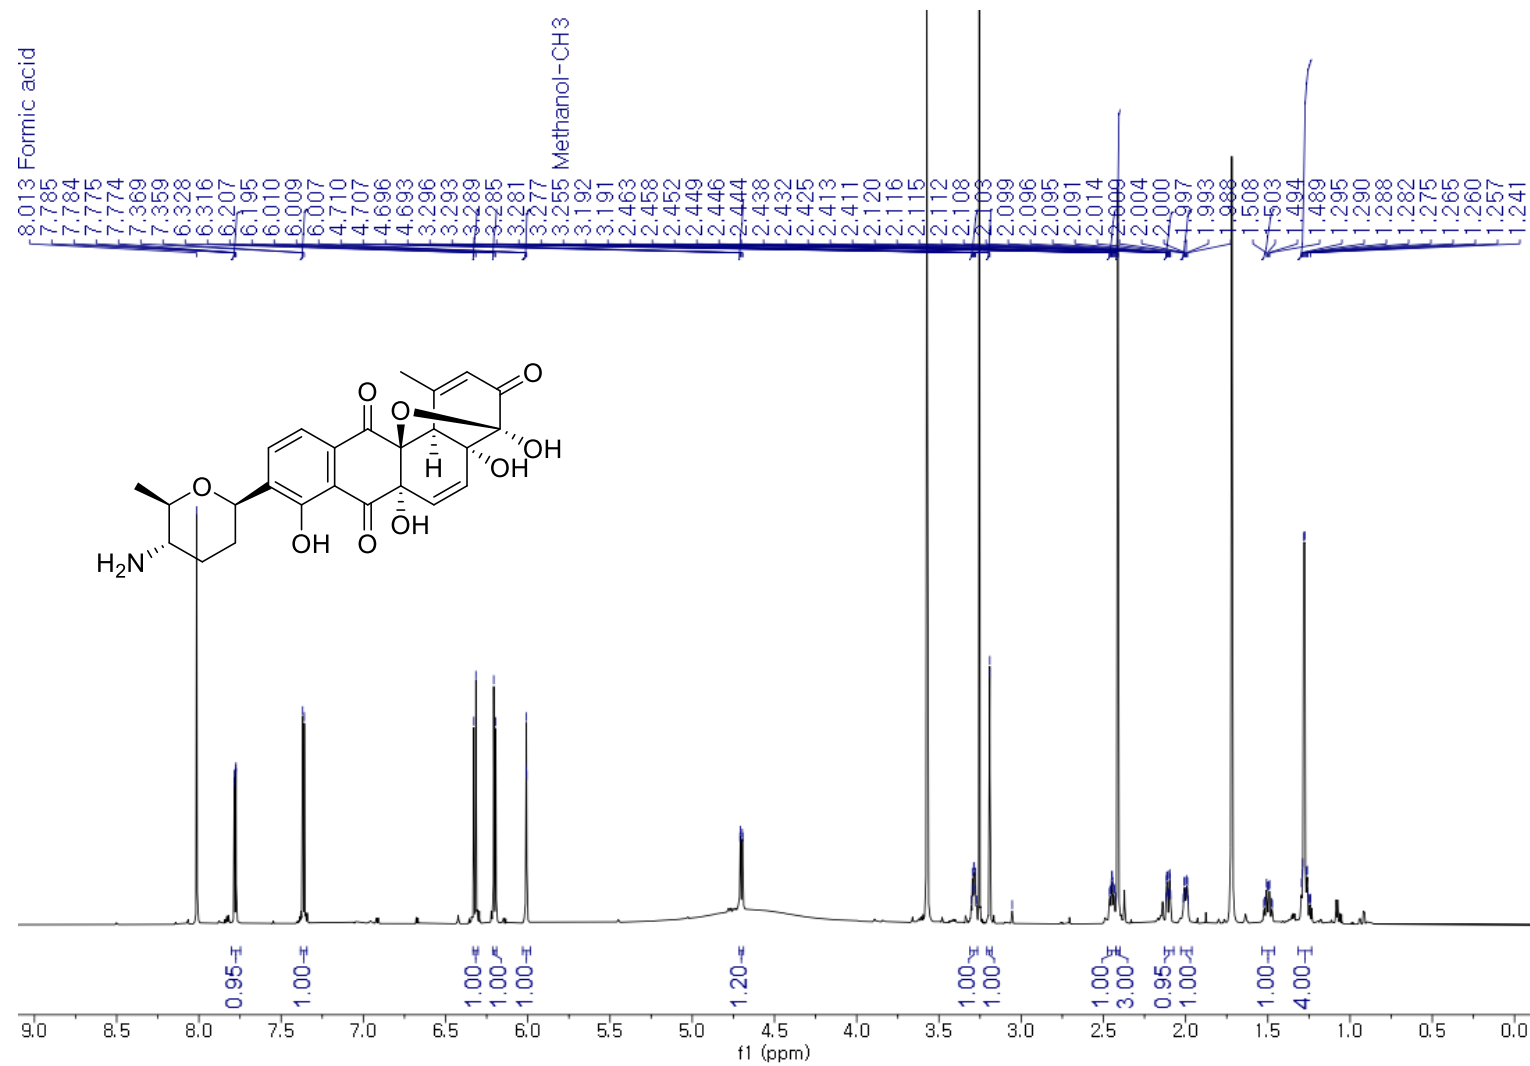

**Figure S10.**  $^{13}\text{C}$  NMR spectrum of tandocyclinone B (**2**) at 200 MHz in  $\text{THF-}d_8$ .

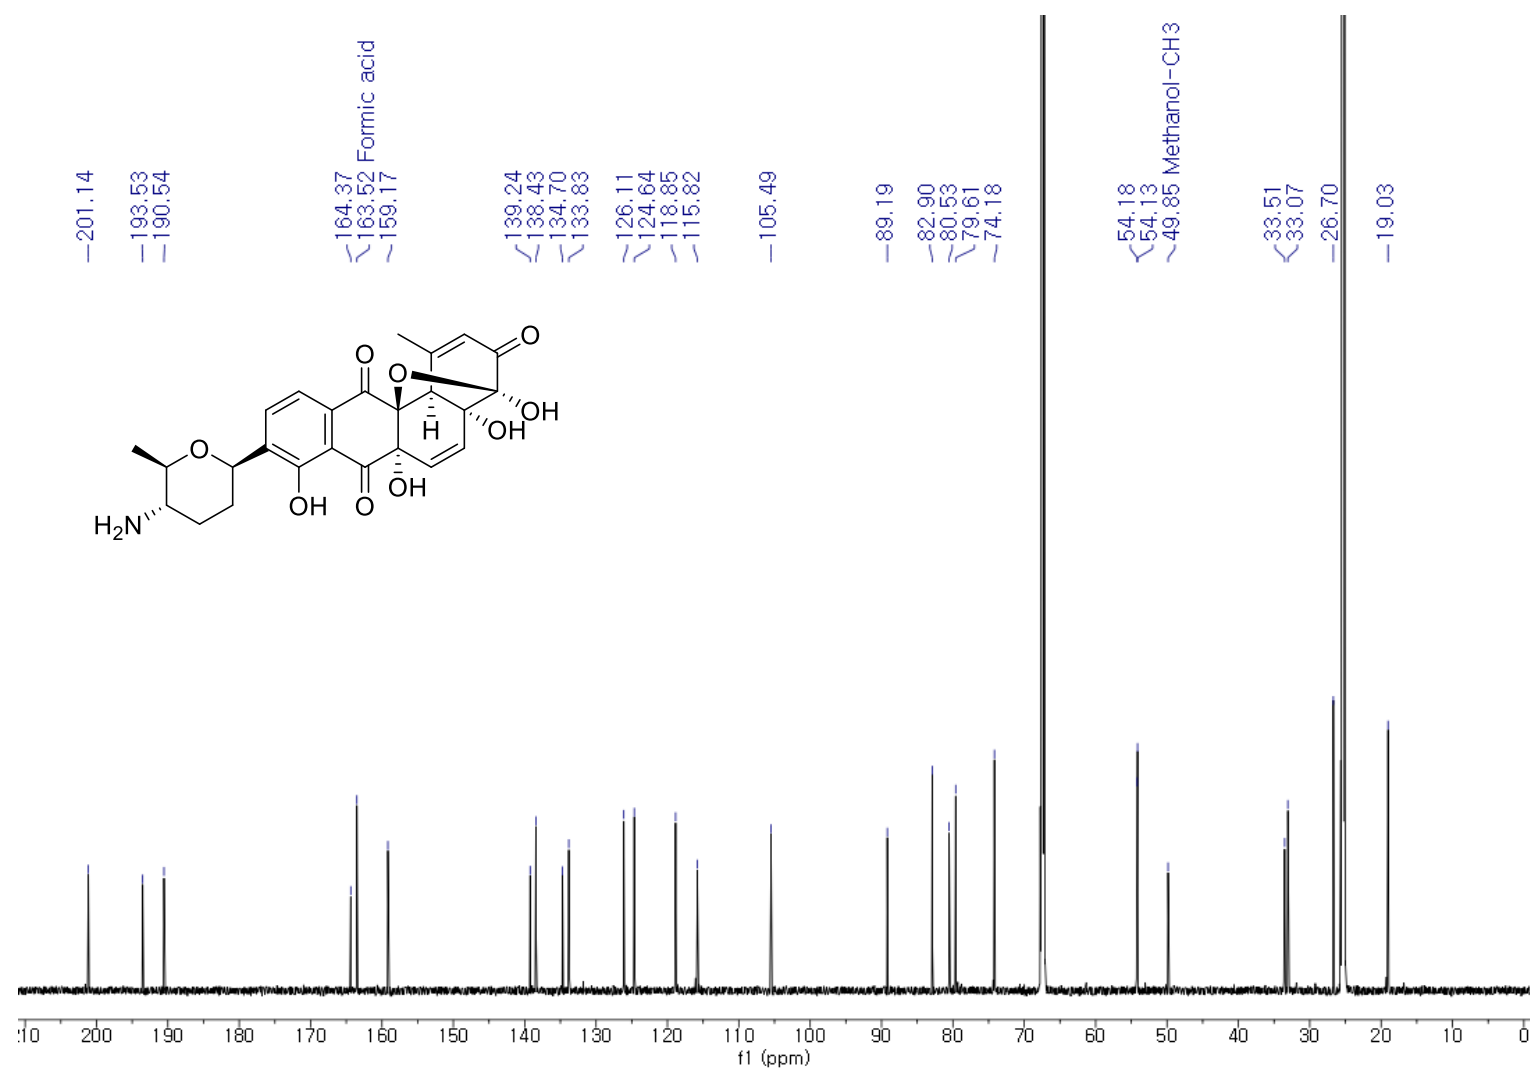

**Figure S11.** COSY NMR spectrum of tandocyclinone B (**2**) at 800 MHz in THF- $d_8$ .

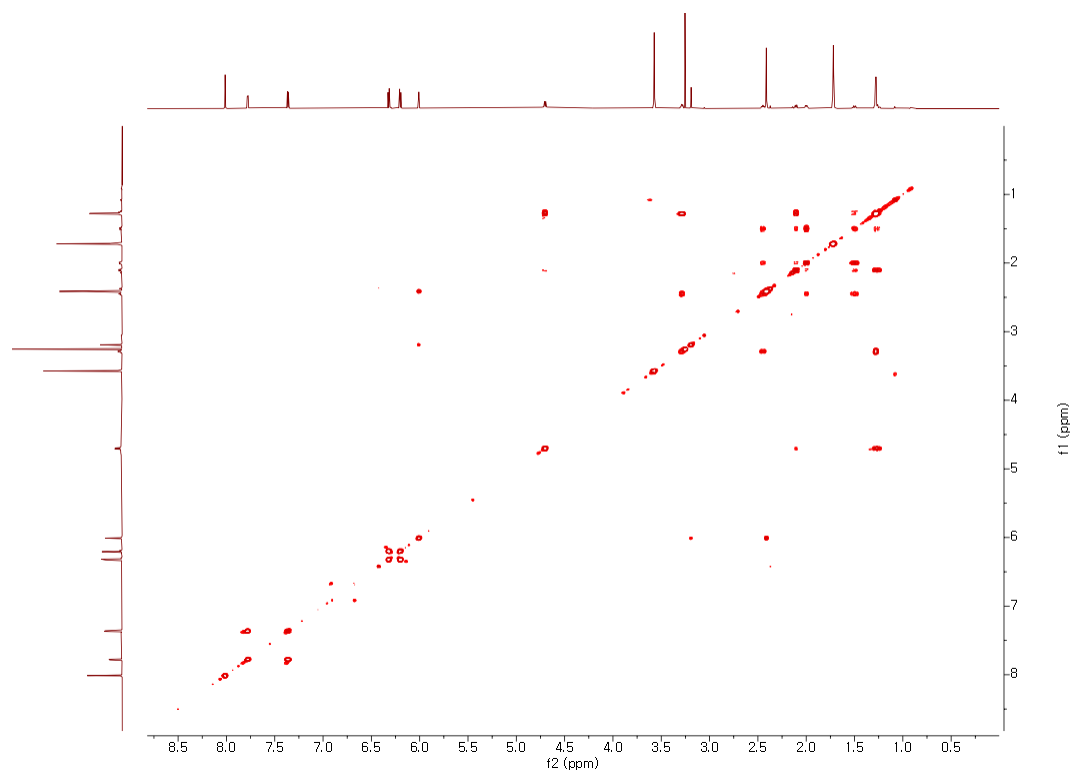

**Figure S12.** HSQC NMR spectrum of tandocyclinone B (**2**) at 800 MHz in THF- $d_8$ .

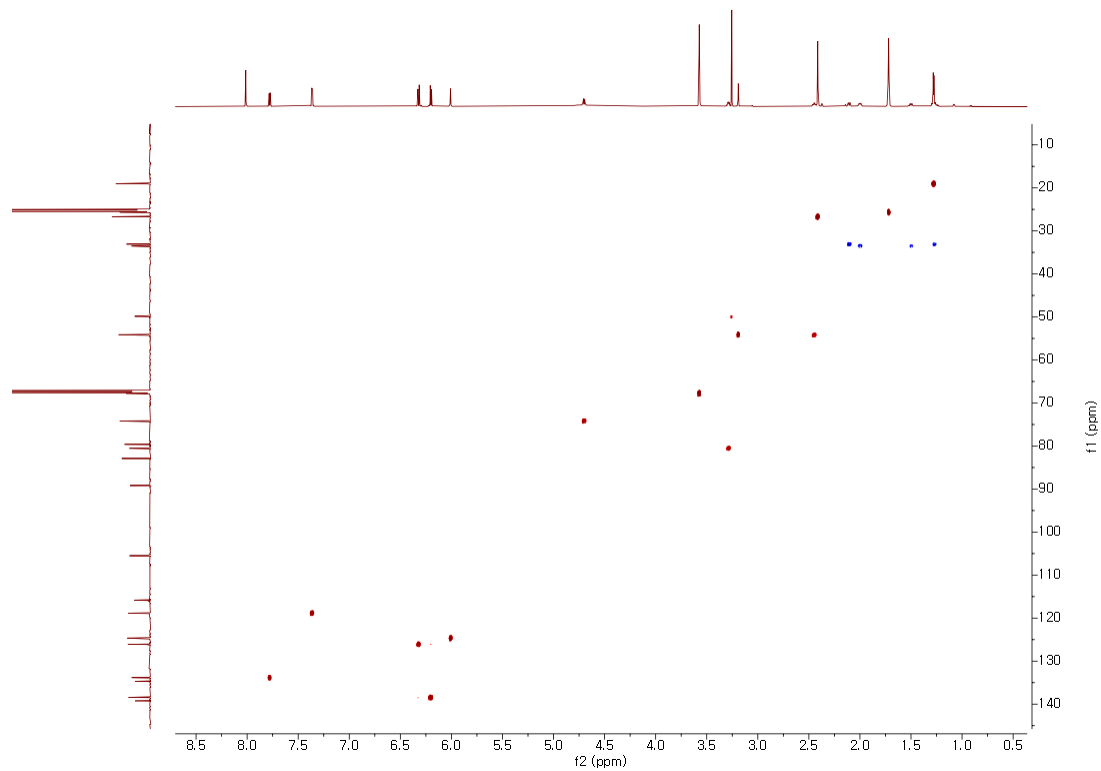

**Figure S13.** HMBC NMR spectrum of tandocyclinone B (**2**) at 800 MHz in THF-*d*<sub>8</sub>.

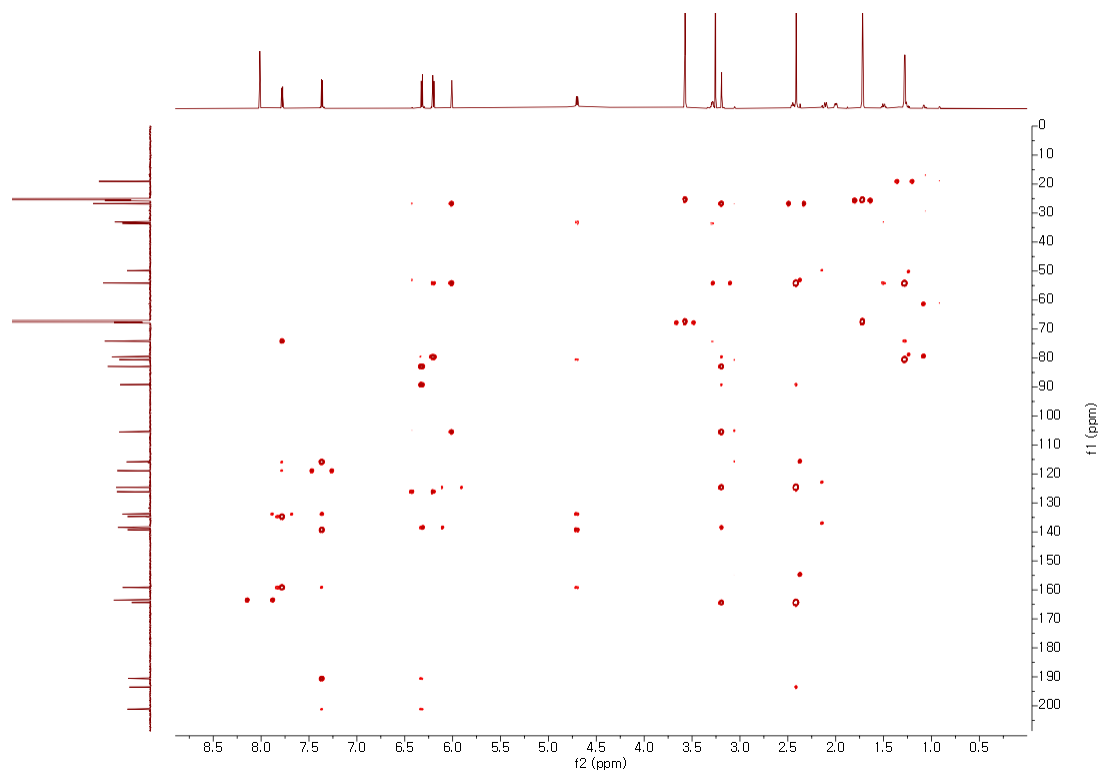

**Figure S14.** ROESY NMR spectrum of tandocyclinone B (**2**) at 800 MHz in THF-*d*<sub>8</sub>.

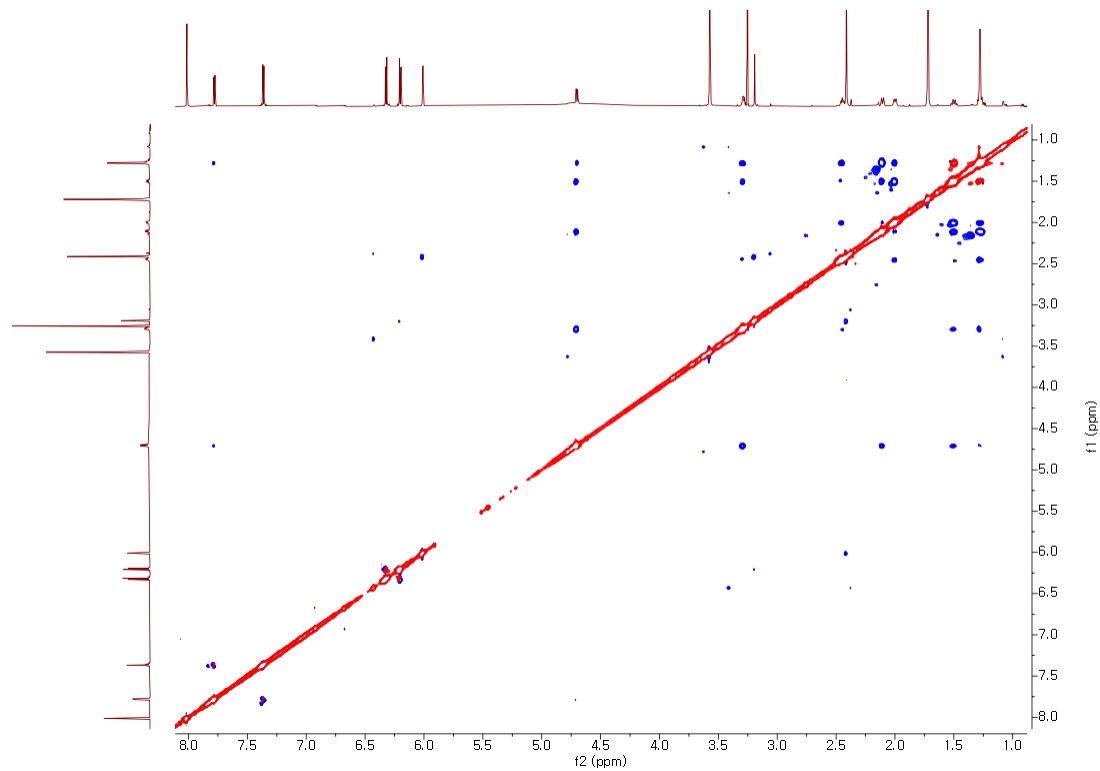

**Figure S15.**  $^1\text{H}$  NMR spectrum of tandocyclinone B (**2**) at 400 MHz in  $\text{CD}_3\text{OD}$ .

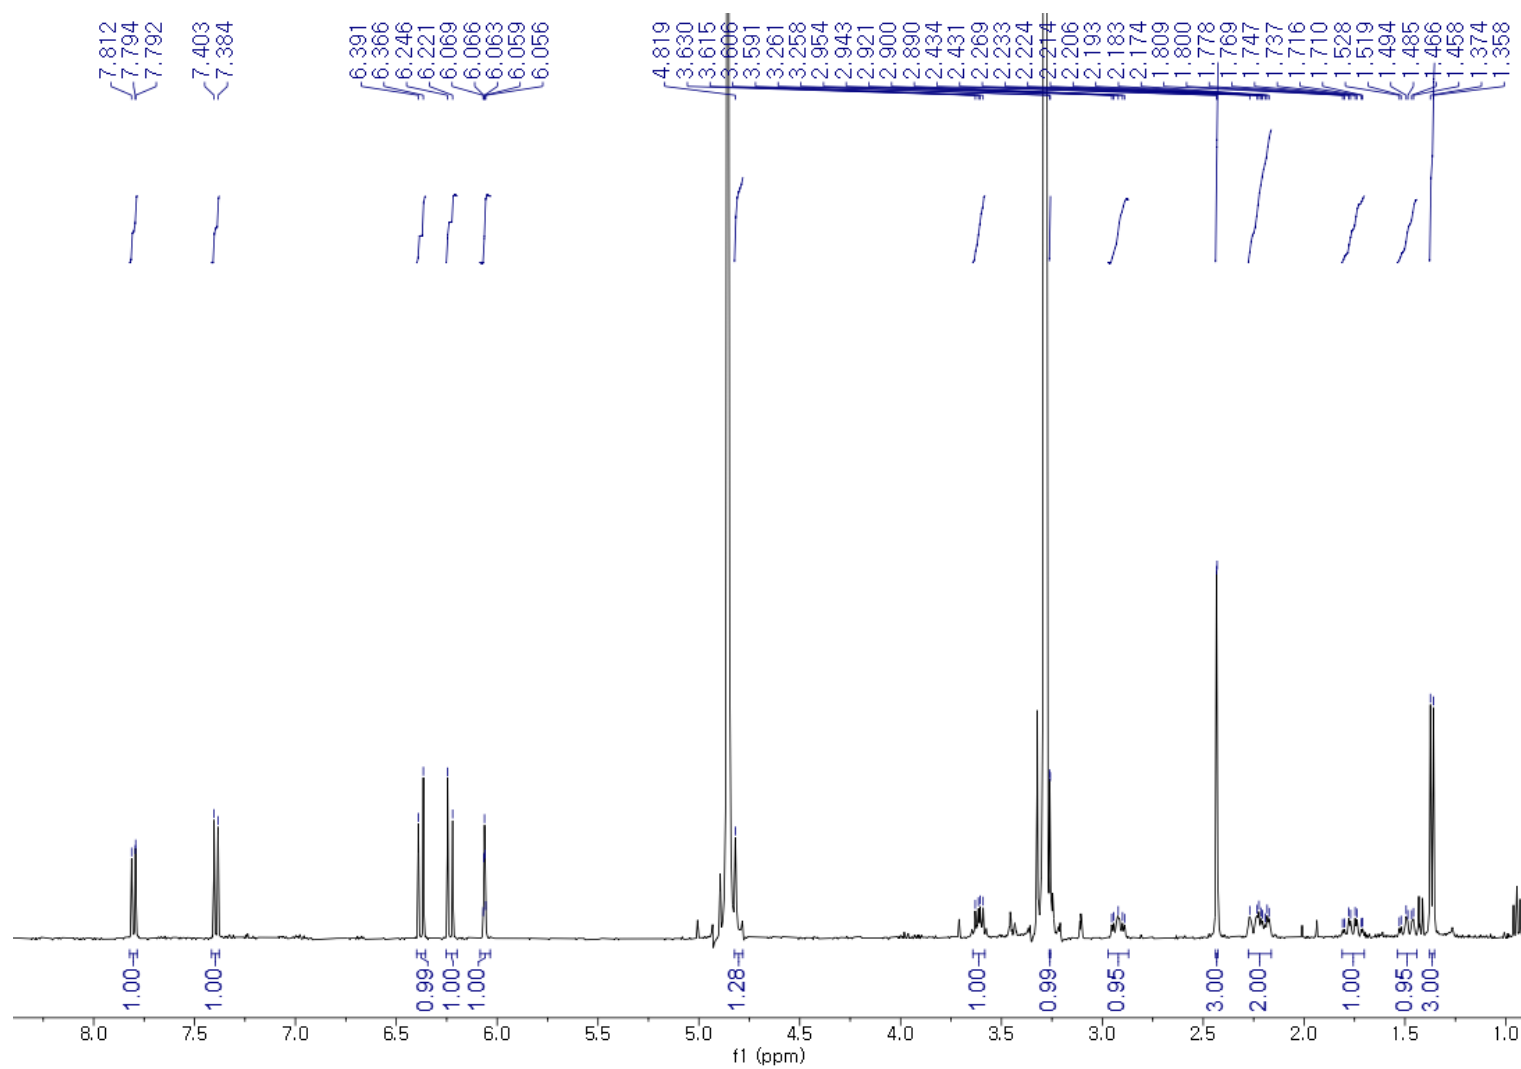

**Figure S16.**  $^1\text{H}$  NMR spectrum of acetylation product of tandocyclinone B (**2**) at 400 MHz in  $\text{CD}_3\text{OD}$ .

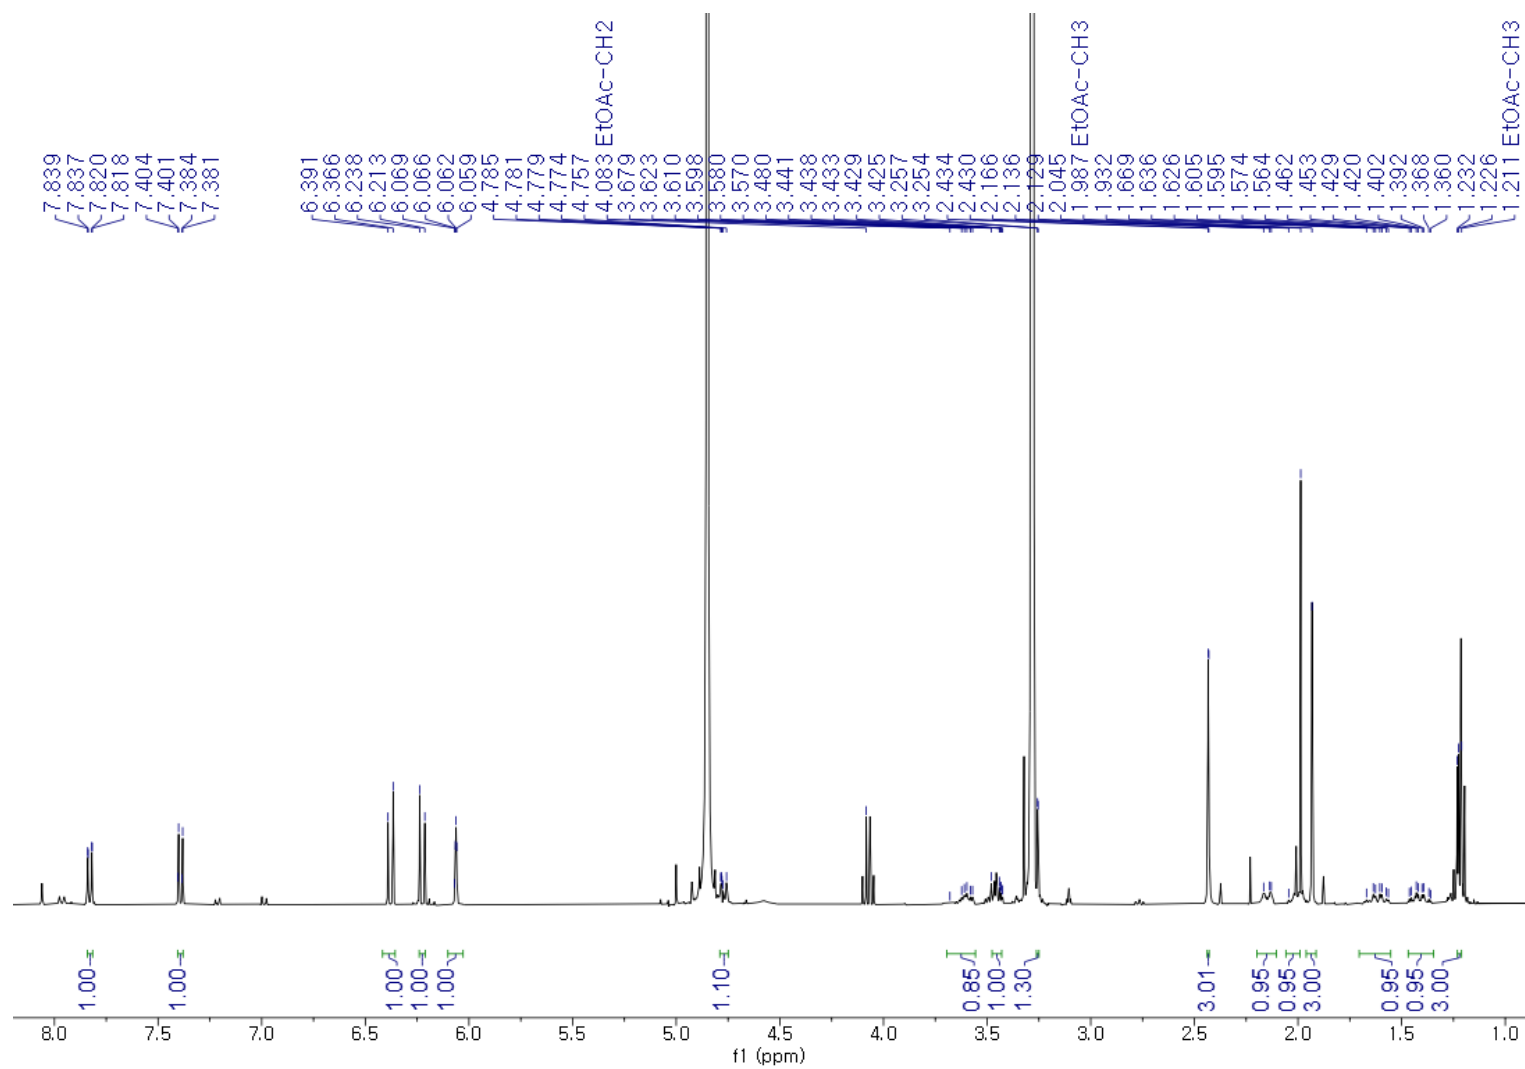

**Figure S17.**  $^1\text{H}$  NMR spectrum of tandocyclinone A (**1**) at 400 MHz in  $\text{CD}_3\text{OD}$ .

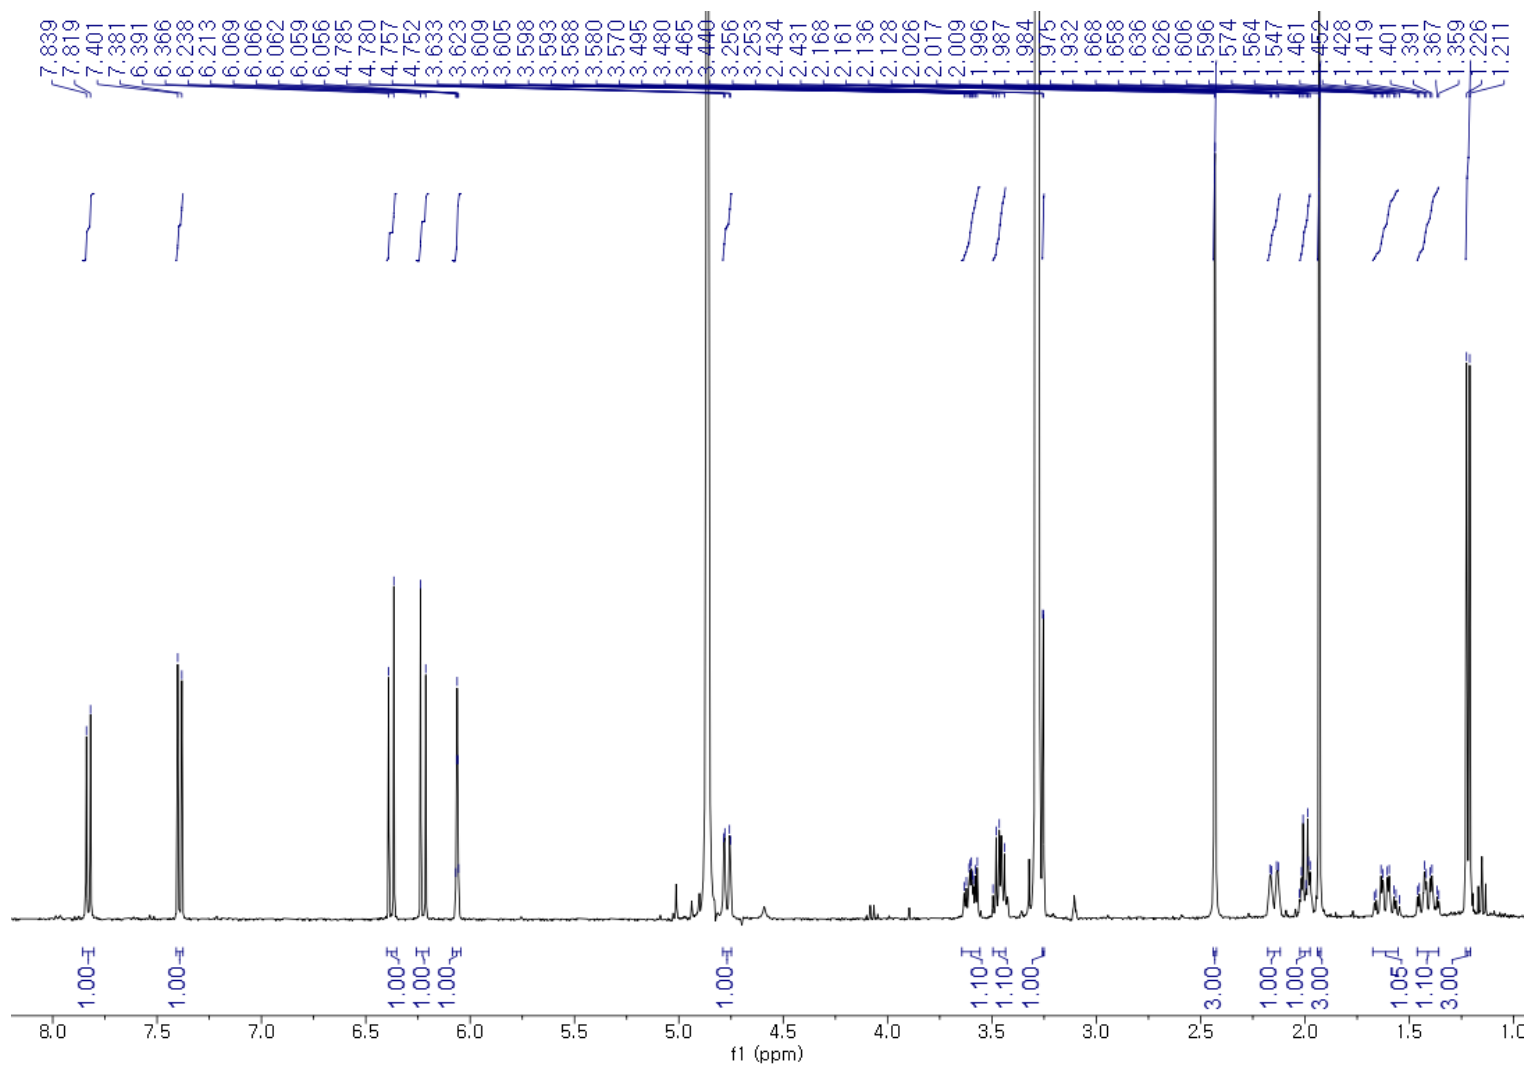



**Figure S18.** Comparison of  $^1\text{H}$  NMR spectra of **2**, acetylation product of **2** and **1** in  $\text{CD}_3\text{OD}$ .

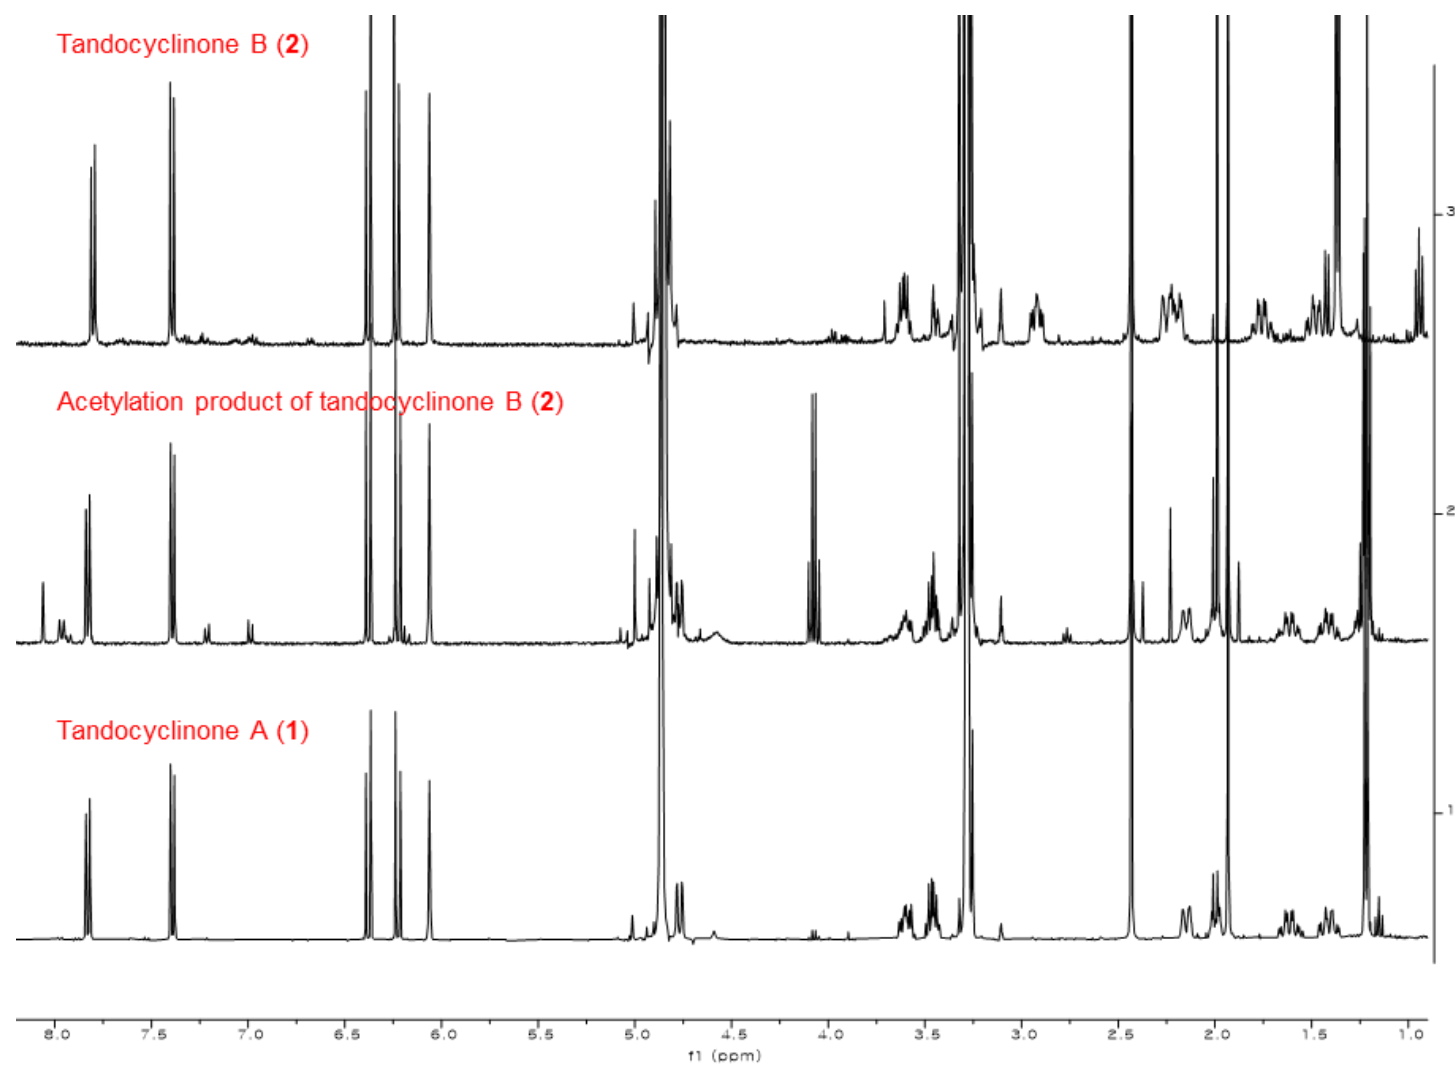



**Figure S20.** COSY NMR spectrum of (*S*)-MTPA amide (**2a**) of tandocyclinone B (**2**) at 800 MHz in CD<sub>3</sub>OD.

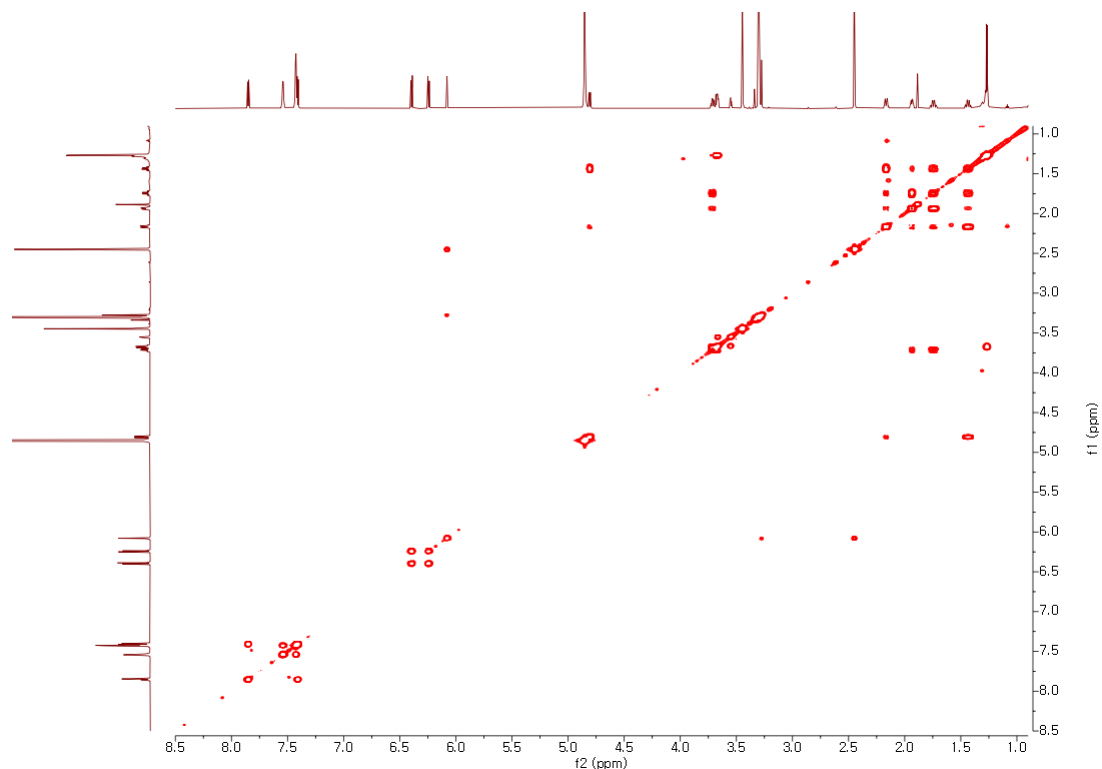

**Figure S21.** HSQC NMR spectrum of (*S*)-MTPA amide (**2a**) of tandocyclinone B (**2**) at 800 MHz in CD<sub>3</sub>OD.

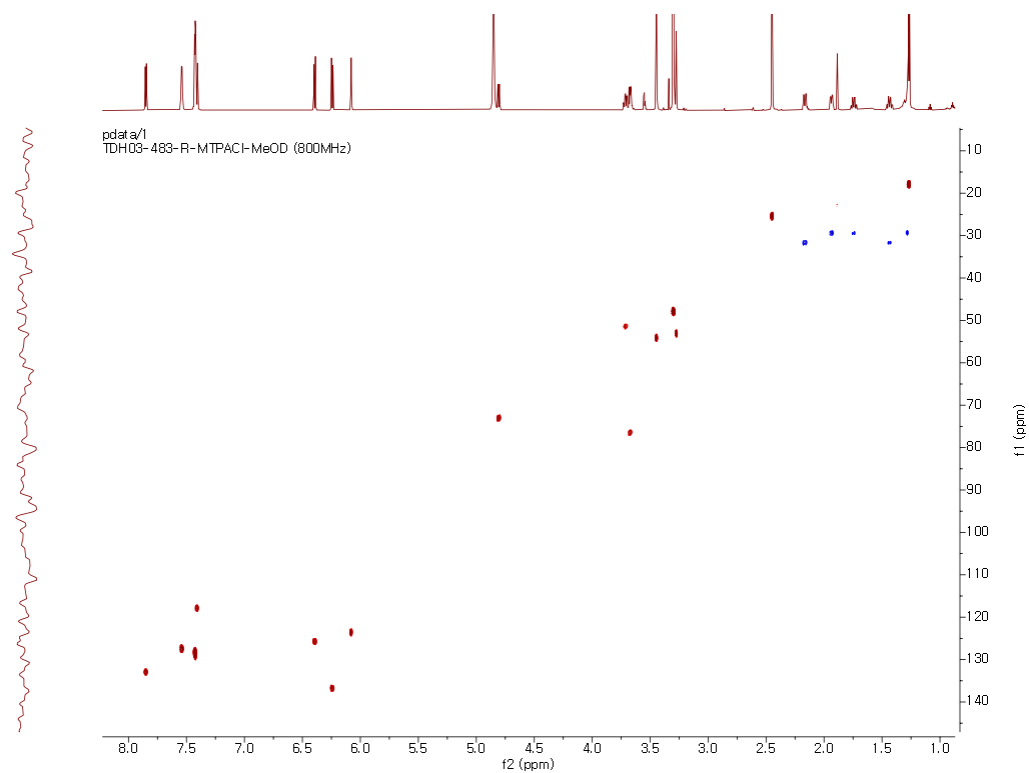

**Figure S22.** HMBC NMR spectrum of (*S*)-MTPA amide (**2a**) of tandocyclinone B (**2**) at 800 MHz in CD<sub>3</sub>OD.

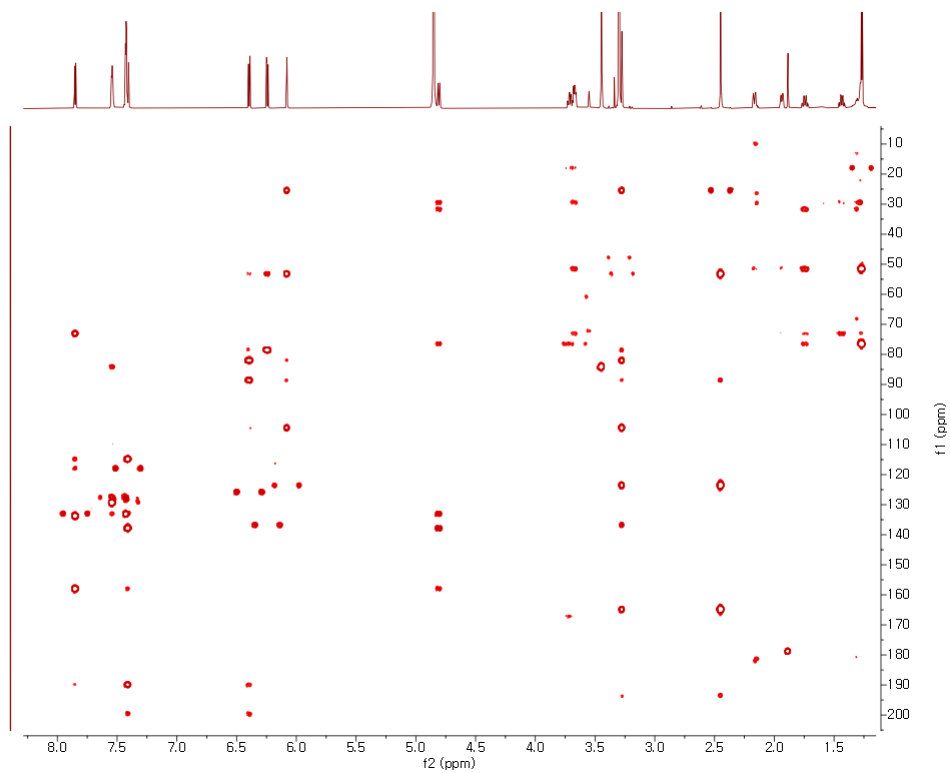

**Figure S23.**  $^1\text{H}$  NMR spectrum of (*R*)-MTPA amide (**2b**) of tandocyclinone B (**2**) at 800 MHz in  $\text{CD}_3\text{OD}$ .

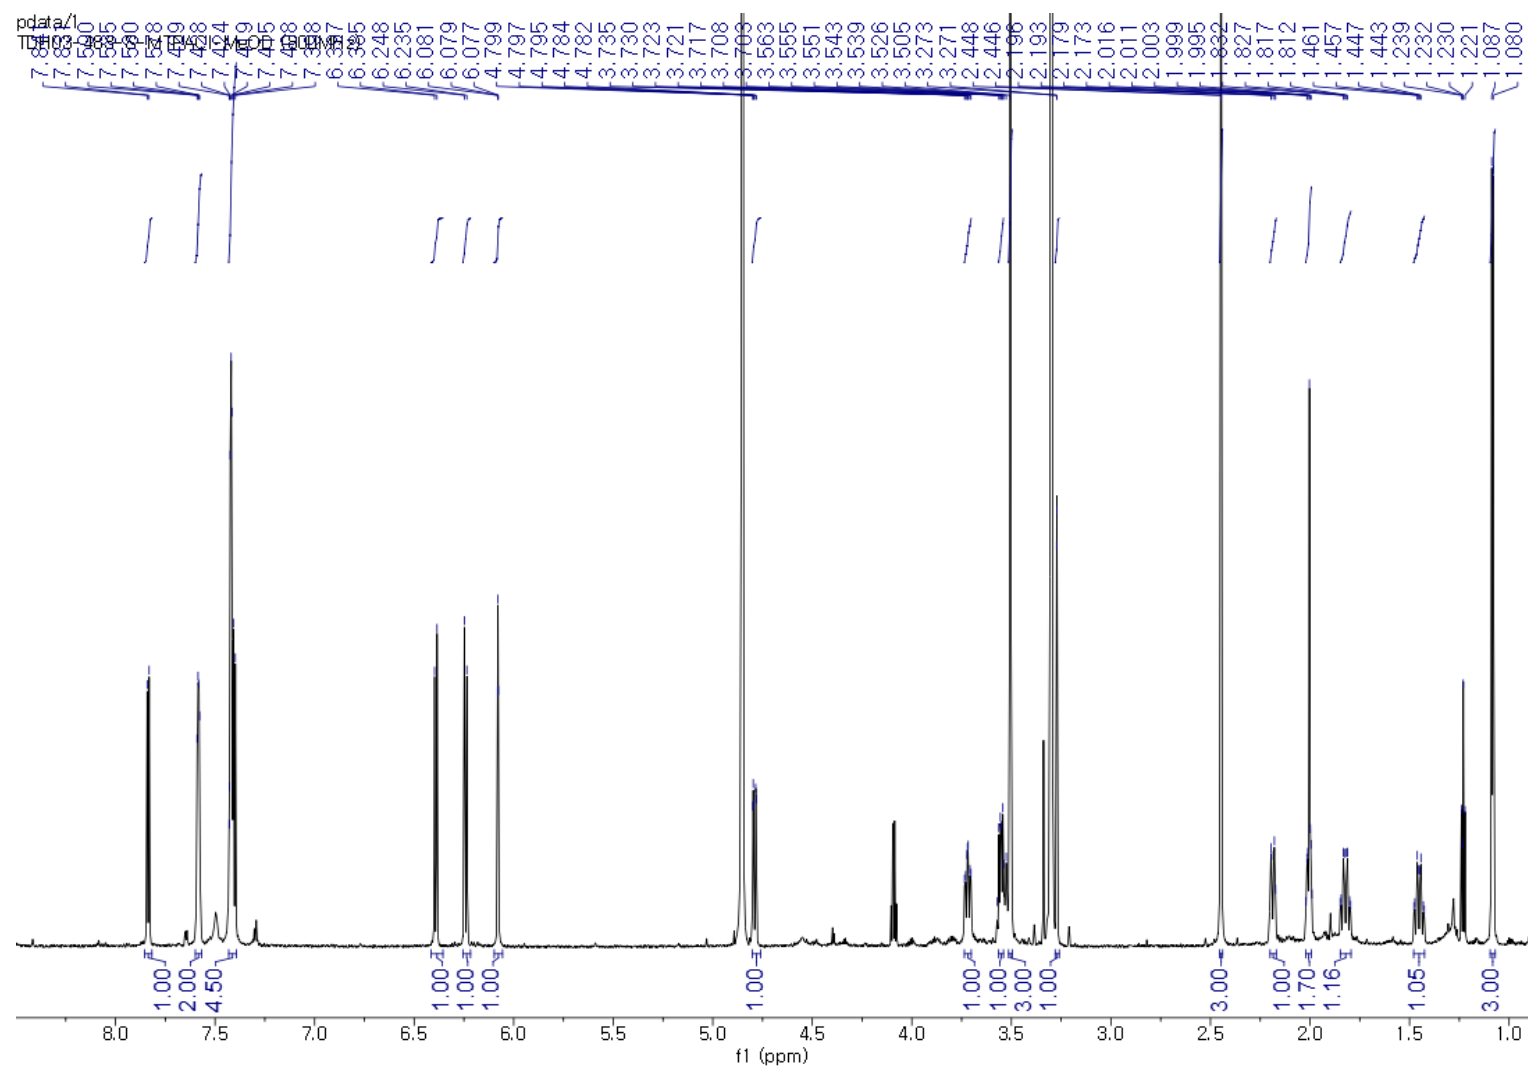

**Figure S24.** COSY NMR spectrum of (*R*)-MTPA amide (**2b**) of tandocyclinone B (**2**) at 800 MHz in CD<sub>3</sub>OD.

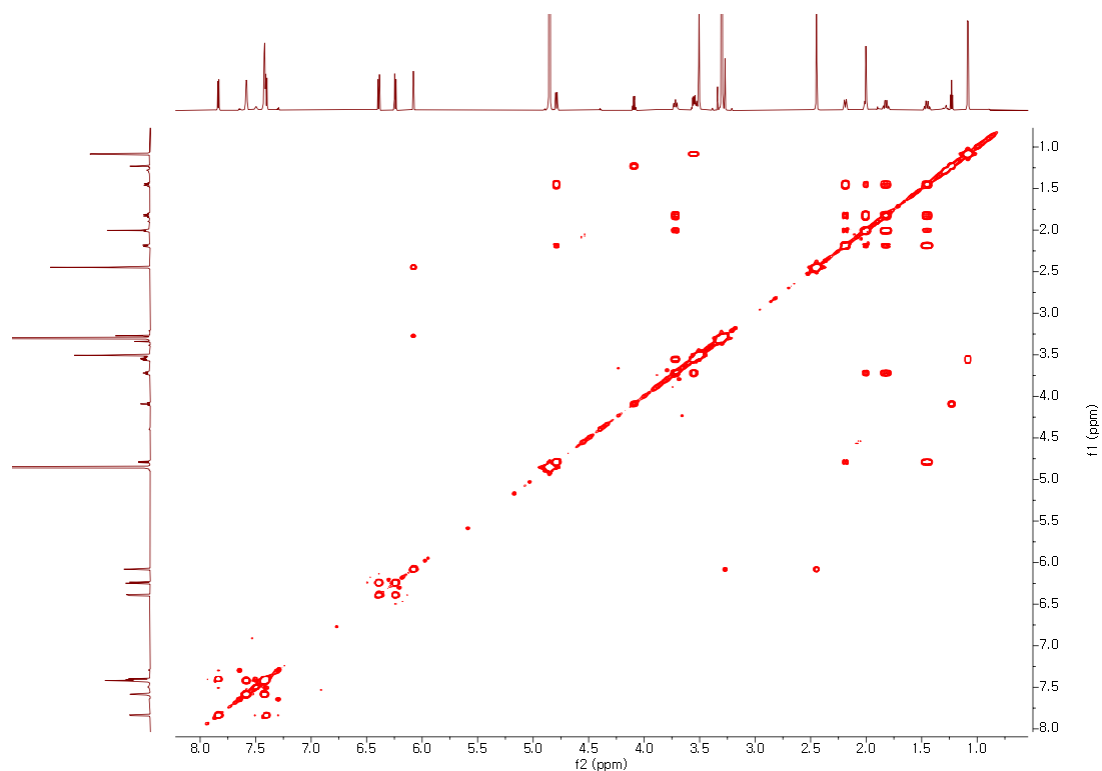

**Figure S25.** HSQC NMR spectrum of (*R*)-MTPA amide (**2b**) of tandocyclinone B (**2**) at 800 MHz in CD<sub>3</sub>OD.

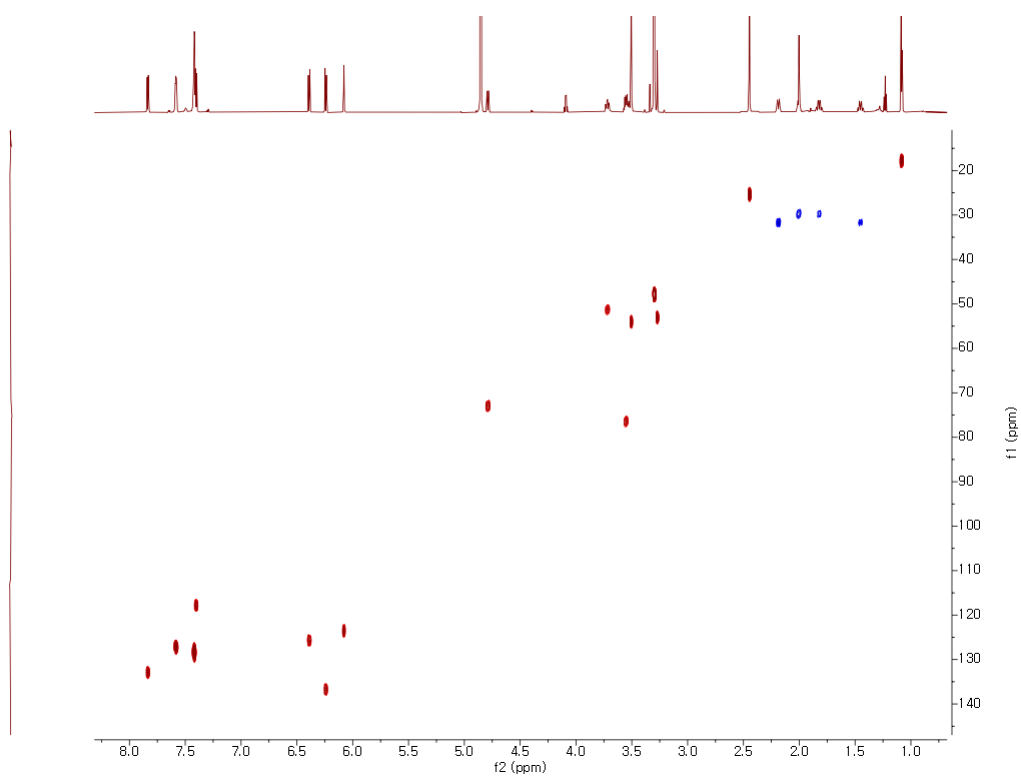

**Figure S26.** HMBC NMR spectrum of (*R*)-MTPA amide (**2b**) of tandocyclinone B (**2**) at 800 MHz in CD<sub>3</sub>OD.

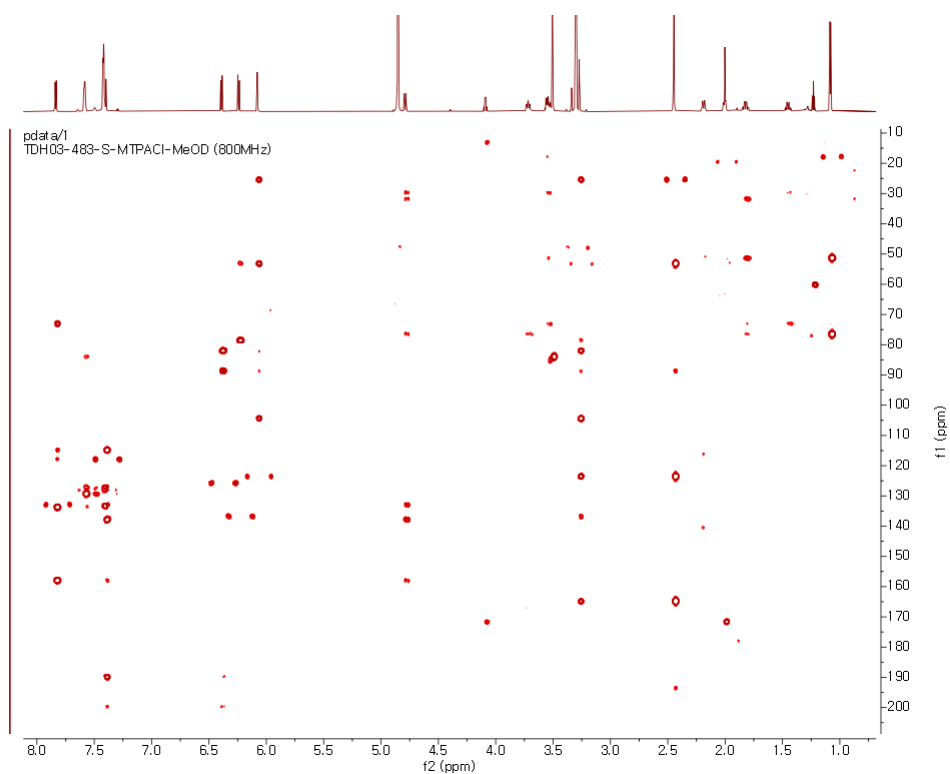

**Figure S27.** Liquid chromatography profiles of tandocyclinone B (**2**), acetylation product of **2**, and tandocyclinone A (**1**).

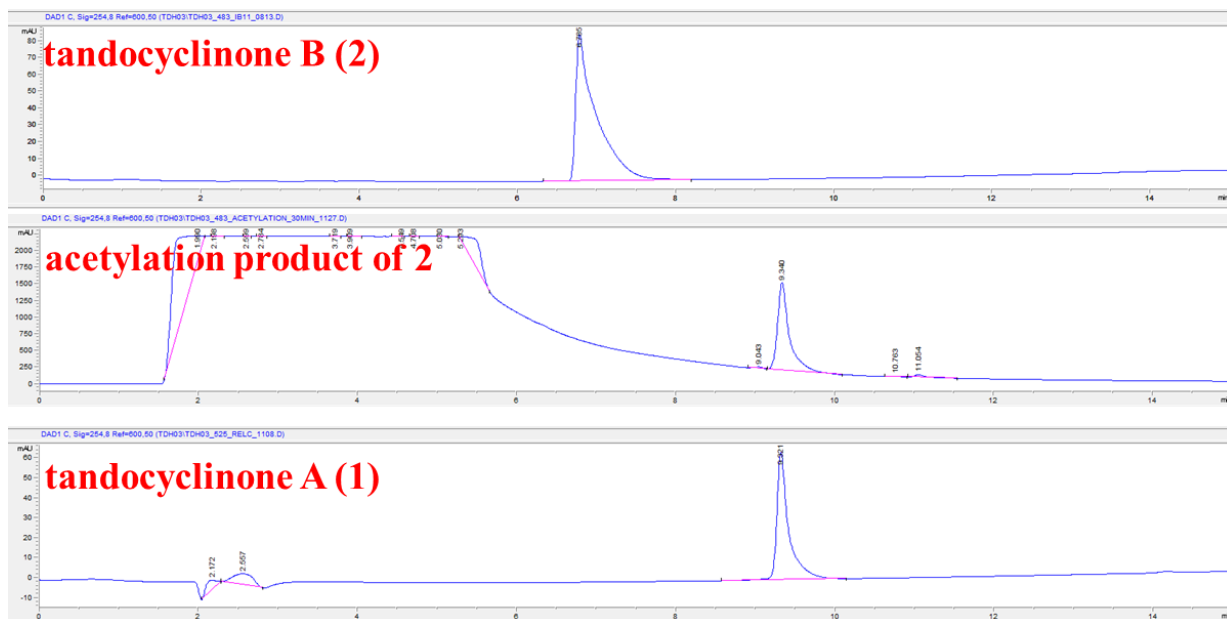

**Figure S28.** CD spectra for tandocyclinones A (**1**, red), and B (**2**, blue).

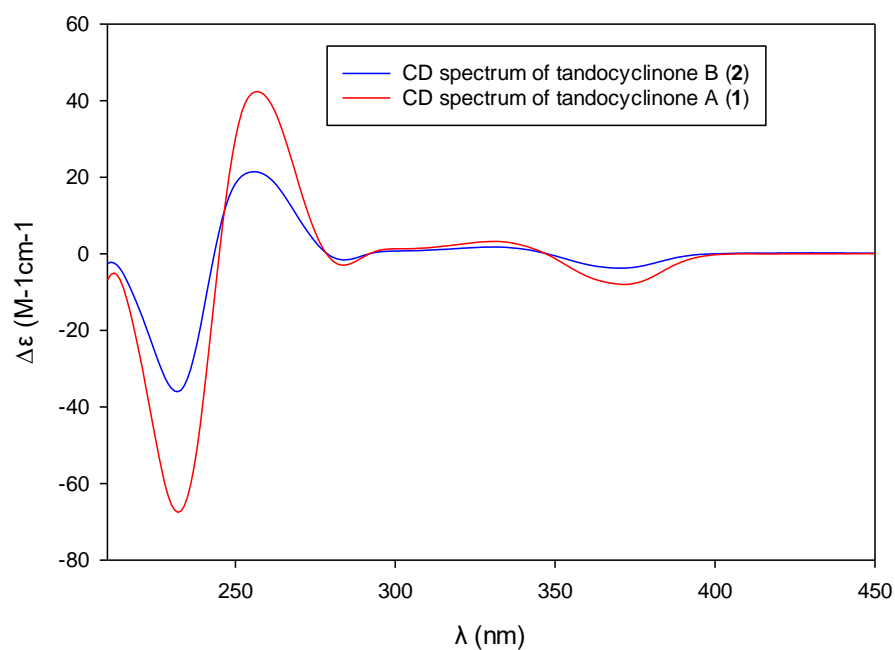



**Figure S29.** IR spectrum of tandocyclinone A (1).

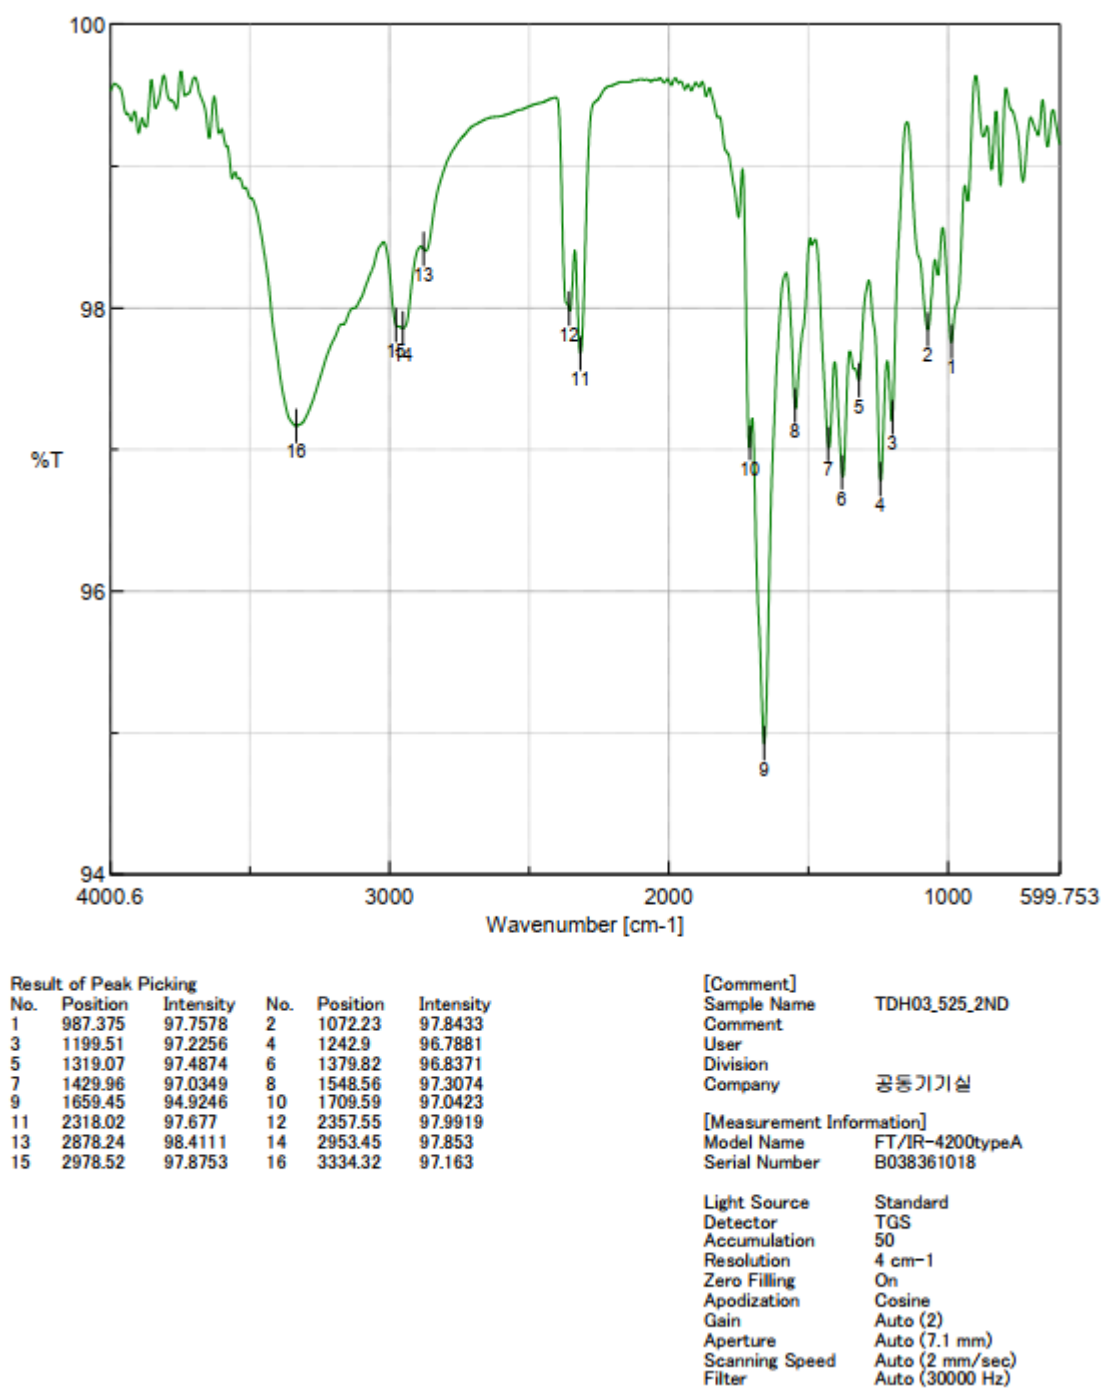

**Figure S30.** IR spectrum of tandocyclinone B (2).

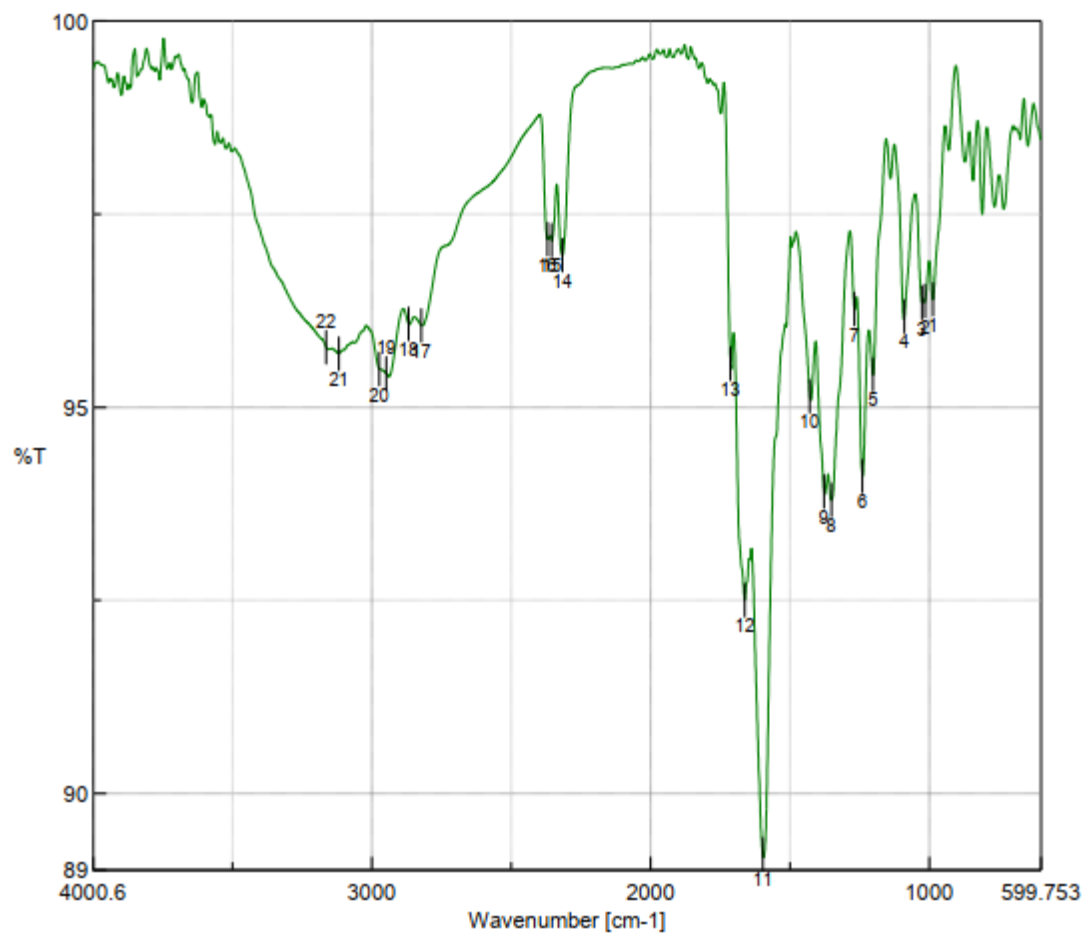

**Result of Peak Picking**

| No. | Position | Intensity | No. | Position | Intensity |
|-----|----------|-----------|-----|----------|-----------|
| 1   | 987.375  | 96.3899   | 2   | 1015.34  | 96.3713   |
| 3   | 1027.87  | 96.3545   | 4   | 1089.58  | 96.1707   |
| 5   | 1203.36  | 95.4207   | 6   | 1240.97  | 94.1056   |
| 7   | 1268.93  | 96.2687   | 8   | 1350.89  | 93.7919   |
| 9   | 1377.89  | 93.9009   | 10  | 1428.99  | 95.1378   |
| 11  | 1598.7   | 89.2046   | 12  | 1663.3   | 92.4979   |
| 13  | 1713.44  | 95.5586   | 14  | 2317.05  | 96.9642   |
| 15  | 2355.62  | 97.161    | 16  | 2370.09  | 97.1714   |
| 17  | 2823.28  | 96.0583   | 18  | 2868.59  | 96.077    |
| 19  | 2948.63  | 95.4344   | 20  | 2973.7   | 95.4925   |
| 21  | 3119.3   | 95.6909   | 22  | 3164.61  | 95.773    |

**[Comment]**

Sample Name TDH03\_483\_3rd  
 Comment  
 User  
 Division  
 Company 공동기기실

**[Measurement Information]**

Model Name FT/IR-4200typeA  
 Serial Number B038361018

Light Source Standard  
 Detector TGS  
 Accumulation 50  
 Resolution 4 cm-1  
 Zero Filling On  
 Apodization Cosine  
 Gain Auto (2)  
 Aperture Auto (7.1 mm)  
 Scanning Speed Auto (2 mm/sec)  
 Filter Auto (30000 Hz)

**Figure S31.** HR-ESI-MS data of tandocyclinone A (1).

Spectrum from TDH03\_525.wiff (sample 1) - TDH03\_525, Experiment 1, +TOF MS (100 - 2000) from 0.366 min

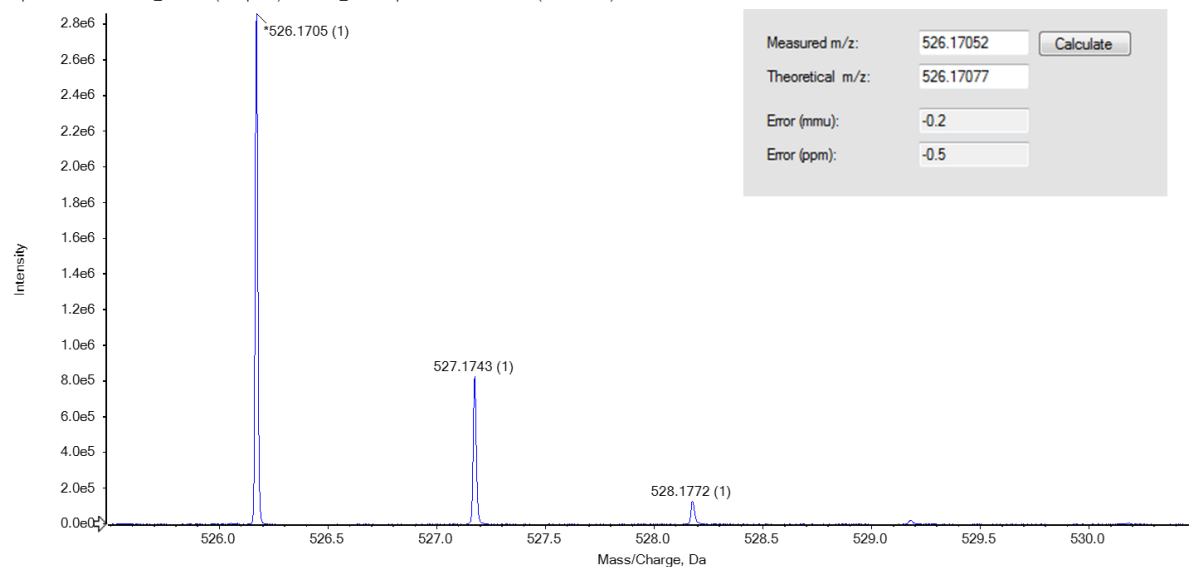

**Figure S32.** HR-ESI-MS data of tandocyclinone B (2).

Spectrum from TDH\_03\_483.wiff (sample 1) - TDH\_03\_483, Experiment 1, +TOF MS (100 - 2000) from 0.401 min

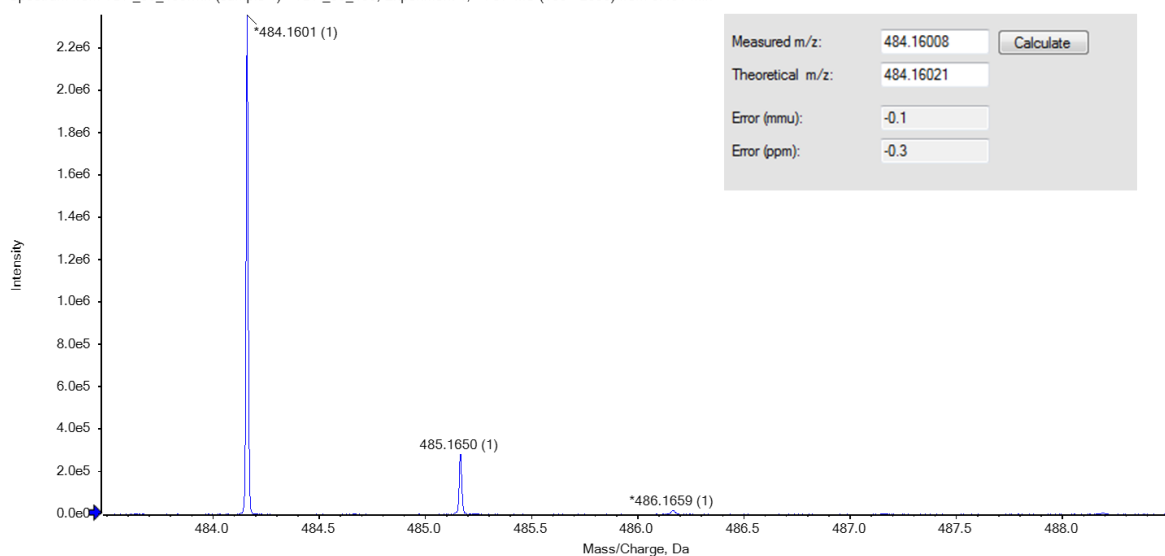

**Figure S33.** HR-ESI-MS data of (*S*)-MTPA amide (**2a**) of tandocyclinone B (**2**).

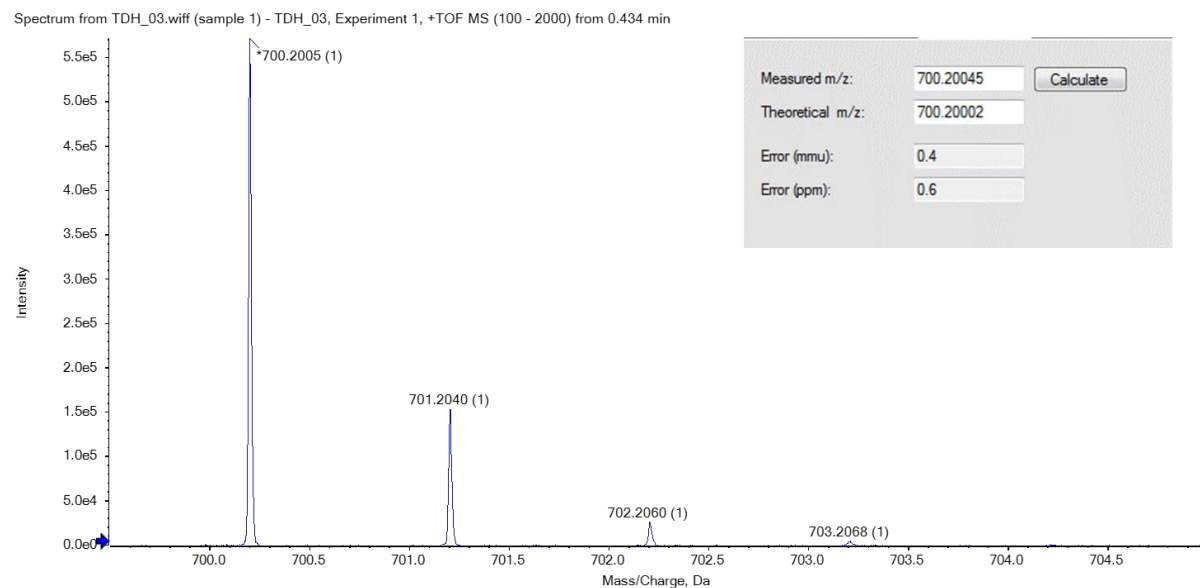

**Figure S34.** Expanded HR-ESI-MS data of (*R*)-MTPA amide (**2b**) of tandocyclinone B (**2**).

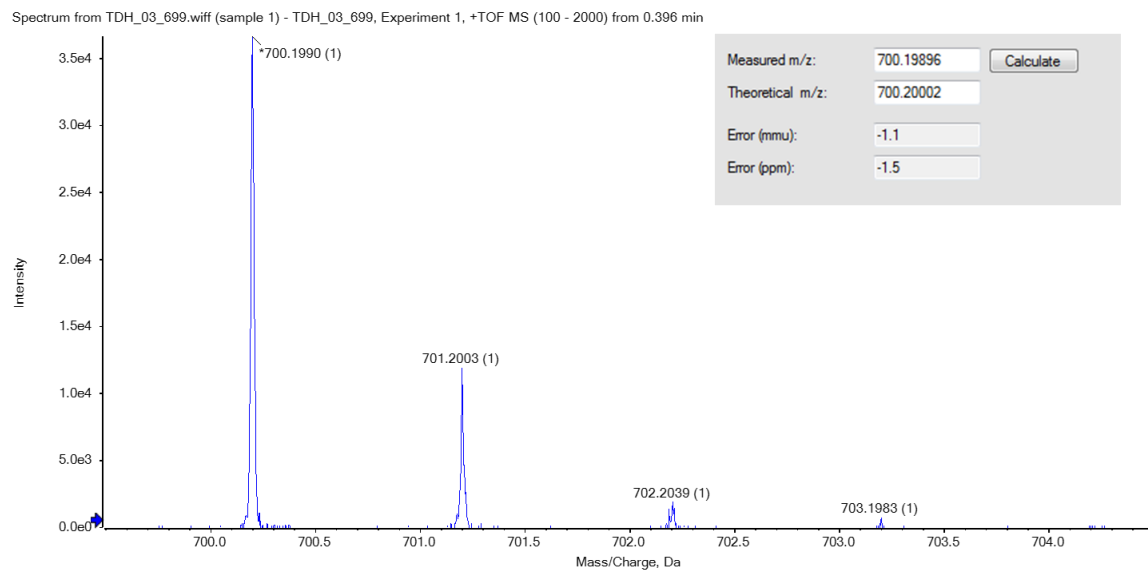

**Figure S35.** The simulated models of two possible diastereomers **1A** (*4S,4aR,6aS,12aS,12bS,1'R,4'S,5'R*) and **1B** (*4R,4aS,6aR,12aR,12bR,1'R,4'S,5'R*) of tandocyclinone A (**1**).

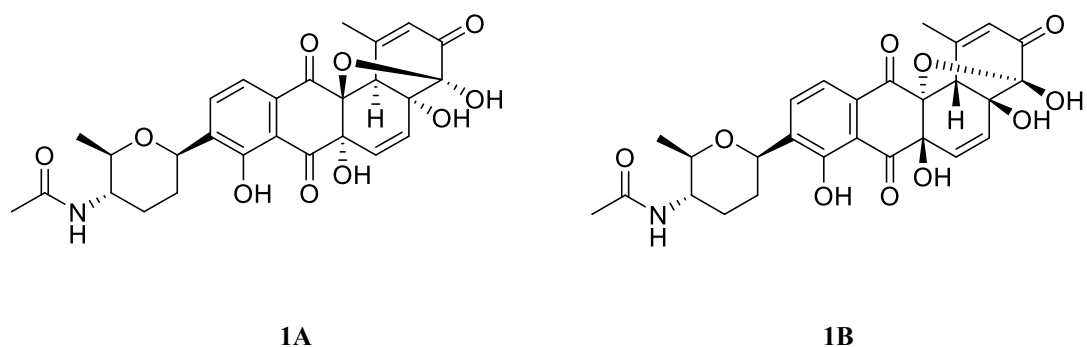

**Table S1.** Energy analysis for diastereomers **1A** (*4S,4aR,6aS,12aS,12bS,1'R,4'S,5'R*) and **1B** (*4R,4aS,6aR,12aR,12bR,1'R,4'S,5'R*) of tandocyclinone A (**1**).

| Conformer | DFT energy (Hartree) | $\Delta E$ (Kcal/mol) | Boltzmann distribution |
|-----------|----------------------|-----------------------|------------------------|
| <b>1A</b> |                      |                       |                        |
| 2         | -1851.804159032      | 0.00                  | 50.06                  |
| 3         | -1851.804122001      | 0.02                  | 47.64                  |
| 1         | -1851.801399921      | 1.73                  | 2.30                   |
| <b>1B</b> |                      |                       |                        |
| 2         | -1851.804093846      | 0.00                  | 49.62                  |
| 3         | -1851.804047192      | 0.03                  | 47.71                  |
| 1         | -1851.801185696      | 1.82                  | 2.67                   |

**Table S2.** ECD calculation of conformer 1 of diastereomer **1A** .

Total energy = -1851.801399921

Kinetic energy = 1843.391596526

Potential energy = -3695.192996447

Parameters of Level DFT

DFT settings (Functional B3LYP / Gridsize M3)

Geometry optimization options (Energy  $10^{-6}$  Hartree, Gradient norm  $|dE / dx_{xyz}| = 10^{-3}$  Hartree/Bohr)Energy minimized coordinates of conformer 1 of diastereomer **1A** at the basis set def2-TZVP for all atoms(Å).

| Atom | Atomic coordinates |             |             | Atom | Atomic coordinates |              |             |
|------|--------------------|-------------|-------------|------|--------------------|--------------|-------------|
| C    | 2.64546617         | -5.74996681 | 17.41241928 | O    | 19.12001953        | -0.85561729  | 0.68881342  |
| C    | 3.47145224         | -7.56104483 | 15.28761035 | H    | 14.91751076        | 2.45560120   | 1.80821877  |
| C    | 5.54282416         | -6.35629565 | 13.65439101 | O    | 14.86052367        | -2.34584481  | 5.84000359  |
| C    | 4.70240820         | -3.71400153 | 12.76455884 | C    | -1.72688777        | -7.46713340  | 18.14446991 |
| O    | 4.06277854         | -2.19463325 | 14.89386512 | C    | -3.43689638        | -8.70866522  | 20.10326974 |
| C    | 1.95321153         | -3.12960916 | 16.30783704 | O    | -2.43866607        | -7.10632406  | 15.96740110 |
| C    | 1.37137290         | -1.14797706 | 18.31123511 | H    | 4.25364373         | -5.44326575  | 18.68699421 |
| C    | 6.73938247         | -2.35453695 | 11.28691604 | H    | 1.81666847         | -8.00607335  | 14.12628321 |
| C    | 7.23620480         | -3.08625053 | 8.76479655  | H    | 4.14172567         | -9.34017574  | 16.11503949 |
| C    | 9.16183967         | -1.86747054 | 7.35740471  | H    | 5.96330482         | -7.54734164  | 12.01507318 |
| C    | 10.57827828        | 0.10035763  | 8.50876893  | H    | 7.29598719         | -6.14221302  | 14.74524415 |
| C    | 10.04857815        | 0.83844075  | 10.96991990 | H    | 3.02837934         | -3.93409665  | 11.54455888 |
| C    | 8.14701598         | -0.39656190 | 12.33642962 | H    | 0.32605384         | -3.36307261  | 15.04013228 |
| N    | 0.62977833         | -6.81904079 | 18.99047180 | H    | -0.27265418        | -1.70083009  | 19.43635428 |
| O    | 5.81183815         | -4.93932439 | 7.77156605  | H    | 2.99168757         | -0.89340861  | 19.57916156 |
| C    | 12.64290998        | 1.38694457  | 7.10131783  | H    | 0.96999566         | 0.66935767   | 17.40863159 |
| C    | 9.57223077         | -2.55430470 | 4.71332720  | H    | 11.13749255        | 2.35954029   | 11.80758181 |
| O    | 13.50620684        | 3.41961026  | 7.75448286  | H    | 7.72137348         | 0.17326921   | 14.25794020 |
| C    | 13.68291743        | -0.09969043 | 4.83093040  | H    | 1.05775915         | -7.20587421  | 20.80826577 |
| C    | 15.76613202        | 1.19385026  | 3.20336741  | H    | 6.37809629         | -5.17406731  | 5.99684488  |
| C    | 16.83364148        | -1.26114360 | 2.00016929  | H    | 15.55884897        | -3.52181879  | -1.30006366 |
| C    | 14.86514419        | -2.50183146 | 0.34310068  | H    | 10.99909134        | -3.33504379  | -0.28696992 |
| C    | 12.40368585        | -2.39025518 | 0.87506648  | H    | 20.86992829        | 2.07412461   | 7.29828090  |
| C    | 11.45680511        | -0.96649476 | 3.14680558  | H    | 8.82758626         | 0.84256222   | 1.22666888  |
| O    | 8.31716446         | -4.21001737 | 3.62905937  | H    | 18.95734926        | -5.68754888  | 5.45686503  |
| C    | 17.77649651        | 2.54329738  | 4.74187793  | H    | 16.14836377        | 6.24423440   | 4.92153421  |
| C    | 19.39392358        | 1.18394831  | 6.18321129  | H    | 19.41857495        | 6.14756575   | 5.70693324  |
| C    | 19.32035529        | -1.55856017 | 6.12684074  | H    | 18.43268162        | 5.84130642   | 2.50817267  |
| C    | 17.21967227        | -2.75901528 | 4.48112040  | H    | 19.91639179        | -2.50148855  | 0.49336089  |
| O    | 10.11859107        | 1.30085152  | 2.45036335  | H    | -5.29911596        | -7.81743811  | 20.01235939 |
| O    | 17.71769849        | -5.27254119 | 4.13097932  | H    | -3.68227955        | -10.70468623 | 19.60893773 |
| C    | 17.96180683        | 5.35621893  | 4.47217506  | H    | -2.72213186        | -8.59150362  | 22.04198958 |
| O    | 20.75920746        | -2.99064643 | 7.25348656  |      |                    |              |             |

**Table S3.** ECD calculation of conformer 2 of diastereomer **1A** .

Total energy = -1851.804159032

Kinetic energy = 1843.392954138

Potential energy = -3695.197113171

Parameters of Level DFT

DFT settings (Functional B3LYP / Gridsize M3)

Geometry optimization options (Energy  $10^{-6}$  Hartree, Gradient norm  $|dE / dx_{xyz}| = 10^{-3}$  Hartree/Bohr)Energy minimized coordinates of conformer 2 of diastereomer **1A** at the basis set def2-TZVP for all atoms(Å).

| Atom | Atomic coordinates |             |             | Atom | Atomic coordinates |              |             |
|------|--------------------|-------------|-------------|------|--------------------|--------------|-------------|
| C    | 1.80158061         | -5.90025287 | 16.42924930 | O    | 19.39274055        | -0.88440481  | 0.99040331  |
| C    | 2.62367277         | -7.56094311 | 14.19208633 | H    | 15.33579740        | 2.61576026   | 2.06015588  |
| C    | 4.83874392         | -6.36221794 | 12.75759571 | O    | 14.73961362        | -2.39442336  | 5.78275973  |
| C    | 4.19355163         | -3.61344762 | 12.05020056 | C    | -0.56904226        | -7.35841348  | 20.22001784 |
| O    | 3.53910771         | -2.22288346 | 14.25795780 | C    | -2.97743790        | -8.65067033  | 21.12413605 |
| C    | 1.35059900         | -3.14971917 | 15.54248284 | O    | 1.11351547         | -6.74590951  | 21.68603427 |
| C    | 0.81656546         | -1.31424334 | 17.69226110 | H    | 3.28721950         | -5.86732720  | 17.86886870 |
| C    | 6.37048256         | -2.27192425 | 10.76798277 | H    | 1.01584815         | -7.79833472  | 12.88894558 |
| C    | 6.94875725         | -2.85283015 | 8.22515141  | H    | 3.12561116         | -9.45171865  | 14.87464636 |
| C    | 9.01092673         | -1.66030279 | 7.00110743  | H    | 5.27677151         | -7.44195206  | 11.04775966 |
| C    | 10.47326969        | 0.13709896  | 8.35528728  | H    | 6.53532633         | -6.34526971  | 13.95017222 |
| C    | 9.86132202         | 0.73625781  | 10.83495942 | H    | 2.56825530         | -3.63823105  | 10.74309952 |
| C    | 7.83015617         | -0.47812323 | 12.02159445 | H    | -0.25641362        | -3.14939479  | 14.20332906 |
| N    | -0.42154472        | -6.95843732 | 17.66210723 | H    | -0.91046839        | -1.84555028  | 18.69558289 |
| O    | 5.47066336         | -4.54198259 | 7.03267388  | H    | 2.37860450         | -1.31309060  | 19.04942210 |
| C    | 12.67592346        | 1.39095972  | 7.13825506  | H    | 0.58829152         | 0.59994765   | 16.94177742 |
| C    | 9.52538594         | -2.19744694 | 4.34017754  | H    | 10.98862705        | 2.12976757   | 11.82903617 |
| O    | 13.59823463        | 3.33663917  | 7.95347623  | H    | 7.34458006         | -0.02170680  | 13.95918186 |
| C    | 13.76477043        | -0.02360826 | 4.84612836  | H    | -1.85393304        | -7.56830156  | 16.55522033 |
| C    | 16.01856675        | 1.22633404  | 3.42427836  | H    | 6.11617008         | -4.68473593  | 5.27440479  |
| C    | 17.01015847        | -1.21902592 | 2.13998456  | H    | 15.80803904        | -3.20525921  | -1.35824460 |
| C    | 15.07662445        | -2.23731675 | 0.29987626  | H    | 11.21430029        | -2.78655208  | -0.60472082 |
| C    | 12.59779627        | -1.99962857 | 0.69240749  | H    | 20.89549461        | 1.55121213   | 7.86234464  |
| C    | 11.59824334        | -0.64878435 | 2.98633843  | H    | 9.21939015         | 1.43230738   | 1.01732664  |
| O    | 8.22733025         | -3.68812169 | 3.08039459  | H    | 18.64992762        | -5.95828336  | 5.44229589  |
| C    | 18.00423495        | 2.35763905  | 5.15749745  | H    | 16.58868853        | 6.13709986   | 5.46121349  |
| C    | 19.44332779        | 0.82016852  | 6.60873716  | H    | 19.79074316        | 5.79149324   | 6.43528429  |
| C    | 19.21231843        | -1.90514214 | 6.38157052  | H    | 18.99444317        | 5.72890642   | 3.17032830  |
| C    | 17.15200359        | -2.87667051 | 4.54424522  | H    | 20.10465653        | -2.56253231  | 0.74940407  |
| O    | 10.44414171        | 1.73501040  | 2.35230435  | H    | -2.49690620        | -10.53101553 | 21.84484433 |
| O    | 17.52146720        | -5.39219118 | 4.07345524  | H    | -3.75892967        | -7.56840437  | 22.70227220 |
| C    | 18.37162472        | 5.16412289  | 5.06972403  | H    | -4.42491200        | -8.85175893  | 19.65831456 |
| O    | 20.49069195        | -3.48666167 | 7.50092462  |      |                    |              |             |

**Table S4.** ECD calculation of conformer 3 of diastereomer **1A** .

Total energy = -1851.804122001

Kinetic energy = 1843.388272313

Potential energy = -3695.192394314

Parameters of Level DFT

DFT settings (Functional B3LYP / Gridsize M3)

Geometry optimization options (Energy  $10^{-6}$  Hartree, Gradient norm  $|dE / dx_{xyz}| = 10^{-3}$  Hartree/Bohr)Energy minimized coordinates of conformer 3 of diastereomer **1A** at the basis set def2-TZVP for all atoms(Å).

| Atom | Atomic coordinates |             |             | Atom | Atomic coordinates |              |             |
|------|--------------------|-------------|-------------|------|--------------------|--------------|-------------|
| C    | 1.81072613         | -5.99701019 | 16.46670405 | O    | 19.43957612        | -0.77180902  | 1.01489773  |
| C    | 2.78490026         | -7.73243152 | 14.34928772 | H    | 15.22690589        | 2.56718358   | 1.99754729  |
| C    | 4.99183691         | -6.51044287 | 12.92062711 | O    | 14.84243256        | -2.38167327  | 5.82911144  |
| C    | 4.25188864         | -3.83310036 | 12.05184804 | C    | -0.67234888        | -7.30865725  | 20.23994076 |
| O    | 3.47036330         | -2.36339232 | 14.16575474 | C    | -3.07675451        | -8.62013778  | 21.12704100 |
| C    | 1.27658042         | -3.31796010 | 15.42075469 | O    | 0.90082438         | -6.50366493  | 21.73404510 |
| C    | 0.58324240         | -1.39696087 | 17.44776236 | H    | 3.23758614         | -5.82390025  | 17.95449784 |
| C    | 6.40399741         | -2.46043444 | 10.76119403 | H    | 1.23472807         | -8.11095911  | 13.01088929 |
| C    | 7.04763625         | -3.10731115 | 8.25024997  | H    | 3.34695204         | -9.55975728  | 15.14830463 |
| C    | 9.07327787         | -1.86813088 | 7.01156837  | H    | 5.53030058         | -7.65642662  | 11.28367479 |
| C    | 10.44275080        | 0.03074038  | 8.32365528  | H    | 6.64782106         | -6.35728332  | 14.15976450 |
| C    | 9.77417463         | 0.68278811  | 10.77556105 | H    | 2.66983577         | -3.99712136  | 10.70328699 |
| C    | 7.77295520         | -0.56932401 | 11.97359729 | H    | -0.27710991        | -3.46030563  | 14.02757300 |
| N    | -0.41141391        | -7.09215307 | 17.66962611 | H    | -1.15660341        | -1.95073706  | 18.41595277 |
| O    | 5.66193728         | -4.90038878 | 7.09938225  | H    | 2.09017909         | -1.25414858  | 18.85811553 |
| C    | 12.60564383        | 1.33891103  | 7.09240103  | H    | 0.30221852         | 0.46233297   | 16.58530552 |
| C    | 9.63598339         | -2.45945756 | 4.37156962  | H    | 10.83152025        | 2.15160397   | 11.73740985 |
| O    | 13.44750002        | 3.33545361  | 7.87109402  | H    | 7.23761120         | -0.06457417  | 13.88600078 |
| C    | 13.76534014        | -0.07894668 | 4.83661795  | H    | -1.75691457        | -7.84831475  | 16.54442537 |
| C    | 15.96621949        | 1.23902423  | 3.39330282  | H    | 6.33766525         | -5.07483915  | 5.35543432  |
| C    | 17.07014252        | -1.18696386 | 2.16518407  | H    | 15.97092315        | -3.29637292  | -1.29472257 |
| C    | 15.19094664        | -2.32916047 | 0.34150864  | H    | 11.36014971        | -3.06995150  | -0.56094505 |
| C    | 12.70265603        | -2.19514438 | 0.72295299  | H    | 20.81169196        | 1.87599569   | 7.83253775  |
| C    | 11.63594227        | -0.84407503 | 2.98611941  | H    | 9.17242057         | 1.08358761   | 0.96413902  |
| O    | 8.42570250         | -4.05202466 | 3.15008780  | H    | 18.90668208        | -5.77662667  | 5.57275595  |
| C    | 17.89474619        | 2.49471919  | 5.10614669  | H    | 16.31386695        | 6.21426534   | 5.32591507  |
| C    | 19.39673431        | 1.05423218  | 6.59271820  | H    | 19.52540142        | 6.03044648   | 6.31195951  |
| C    | 19.28720443        | -1.68280836 | 6.42468491  | H    | 18.74063486        | 5.86282045   | 3.04788948  |
| C    | 17.27709414        | -2.78406017 | 4.60526412  | H    | 20.22527014        | -2.42165887  | 0.81055768  |
| O    | 10.37358921        | 1.46922696  | 2.29913441  | H    | -4.29369263        | -9.28206699  | 19.58952129 |
| O    | 17.75818212        | -5.29047967 | 4.19000018  | H    | -2.55351845        | -10.23232638 | 22.31272136 |
| C    | 18.13859809        | 5.31214790  | 4.95803057  | H    | -4.15146361        | -7.31006618  | 22.31434281 |
| O    | 20.63130157        | -3.18130720 | 7.58085426  |      |                    |              |             |



**Table S5.** ECD calculation of conformer 1 of diastereomer **1B**.

Total energy = -1851.801185696

Kinetic energy = 1843.391653858

Potential energy = -3695.192839555

Parameters of Level DFT

DFT settings (Functional B3LYP / Gridsize M3)

Geometry optimization options (Energy  $10^{-6}$  Hartree, Gradient norm  $|dE / dx| = 10^{-3}$  Hartree/Bohr)Energy minimized coordinates of conformer 1 of diastereomer **1B** at the basis set def2-TZVP for all atoms(Å).

| Atom | Atomic coordinates |              |              | Atom | Atomic coordinates |              |              |
|------|--------------------|--------------|--------------|------|--------------------|--------------|--------------|
| C    | -28.64492164       | -9.00466975  | -4.18394303  | O    | -5.36332591        | -4.77617303  | -10.41437238 |
| C    | -26.94919431       | -7.80434855  | -2.14544195  | H    | -9.53381180        | -1.30130379  | -9.80463582  |
| C    | -24.60928967       | -6.57902258  | -3.34507906  | O    | -11.68478325       | -7.17021164  | -9.31575225  |
| C    | -23.26982773       | -8.48210420  | -5.09589401  | C    | -30.83819679       | -12.22029096 | -1.45450240  |
| O    | -25.00458610       | -9.40502704  | -6.93789076  | C    | -33.40938769       | -13.04233696 | -0.44685762  |
| C    | -27.07699316       | -10.79538998 | -5.88740653  | O    | -28.88063111       | -13.26959606 | -0.79033696  |
| C    | -28.55529844       | -11.86313536 | -8.11229093  | H    | -29.36497864       | -7.50097399  | -5.41934845  |
| C    | -21.04793540       | -7.32148815  | -6.47543362  | H    | -26.37774755       | -9.28316562  | -0.81555114  |
| C    | -18.76331591       | -6.89534756  | -5.15610837  | H    | -28.03753251       | -6.39890489  | -1.07759975  |
| C    | -16.66237166       | -5.80078162  | -6.40655386  | H    | -23.29680421       | -5.92940030  | -1.88324781  |
| C    | -16.89008109       | -5.11577511  | -8.99122371  | H    | -25.15655869       | -4.93100214  | -4.48340339  |
| C    | -19.15100975       | -5.50522802  | -10.26336363 | H    | -22.58191119       | -10.07028089 | -3.93730443  |
| C    | -21.19665693       | -6.61913625  | -9.00561485  | H    | -26.34133843       | -12.34023253 | -4.71167523  |
| N    | -30.88891267       | -10.23242010 | -3.10850035  | H    | -30.13623445       | -13.02202263 | -7.45468310  |
| O    | -18.67729625       | -7.55094335  | -2.70417081  | H    | -29.29805181       | -10.33353082 | -9.29841627  |
| C    | -14.71451302       | -3.98639585  | -10.36719506 | H    | -27.31821895       | -13.03953110 | -9.28003086  |
| C    | -14.34583903       | -5.27766896  | -4.99543237  | H    | -19.28741249       | -4.96372309  | -12.23563912 |
| O    | -14.96627561       | -2.83732048  | -12.34679182 | H    | -22.94840936       | -6.98164787  | -10.00547314 |
| C    | -12.11767023       | -4.48020758  | -9.16050508  | H    | -32.58583540       | -9.46996247  | -3.52833000  |
| C    | -9.77056389        | -3.24935857  | -10.44146864 | H    | -16.95650037       | -7.12774439  | -2.08361849  |
| C    | -7.76632542        | -5.06041547  | -9.29303366  | H    | -5.82590831        | -5.05794528  | -5.56873851  |
| C    | -7.65611742        | -4.76086061  | -6.45451610  | H    | -9.62524198        | -4.04163308  | -3.04222506  |
| C    | -9.69782462        | -4.19590634  | -5.08829713  | H    | -9.51456663        | -5.88882493  | -16.48765273 |
| C    | -12.22286448       | -3.77776188  | -6.32657288  | H    | -12.85534757       | -0.60267465  | -4.48650808  |
| O    | -14.10704462       | -5.79636833  | -2.72280940  | H    | -8.12149613        | -10.98767392 | -10.20599457 |
| C    | -9.78638523        | -3.41431816  | -13.30513778 | H    | -8.28439606        | 0.18474933   | -14.34847416 |
| C    | -9.52800499        | -5.68913900  | -14.44446055 | H    | -10.03575224       | -1.31776022  | -16.79231680 |
| C    | -9.06707642        | -7.93982604  | -12.94300456 | H    | -11.62645776       | 0.08390666   | -14.18012114 |
| C    | -9.05796486        | -7.57475029  | -10.03919458 | H    | -4.40122550        | -6.28586081  | -9.99378822  |
| O    | -12.98914717       | -1.16591508  | -6.22991373  | H    | -33.58276883       | -12.43841097 | 1.52686711   |
| O    | -8.04175949        | -9.66220558  | -8.90088239  | H    | -35.01176920       | -12.27983829 | -1.51216978  |
| C    | -9.95159417        | -0.98600679  | -14.75381105 | H    | -33.49752208       | -15.10631751 | -0.47177193  |
| O    | -8.68945819        | -10.07825574 | -13.76359474 |      |                    |              |              |

**Table S6.** ECD calculation of conformer 2 of diastereomer **2B**.

Total energy = -1851.804093846

Kinetic energy = 1843.399002355

Potential energy = -3695.203096201

Parameters of Level DFT

DFT settings (Functional B3LYP / Gridsize M3)

Geometry optimization options (Energy  $10^{-6}$  Hartree, Gradient norm  $|dE/dxyz| = 10^{-3}$  Hartree/Bohr)Energy minimized coordinates of conformer 2 of diastereomer **2B** at the basis set def2-TZVP for all atoms(Å).

| Atom | Atomic coordinates |              |              | Atom | Atomic coordinates |              |              |
|------|--------------------|--------------|--------------|------|--------------------|--------------|--------------|
| C    | -28.11283176       | -9.89002125  | -3.45022128  | O    | -5.40014076        | -4.45686157  | -10.78735123 |
| C    | -26.34941553       | -8.65608015  | -1.49940118  | H    | -9.66249095        | -1.16190382  | -9.87661730  |
| C    | -24.16427341       | -7.25871466  | -2.79581679  | O    | -11.56252778       | -7.12037411  | -9.43303907  |
| C    | -22.83213990       | -9.03371647  | -4.68046602  | C    | -32.59455477       | -11.09212798 | -2.67452198  |
| O    | -24.61356679       | -9.99252075  | -6.45362007  | C    | -34.33862207       | -12.71369778 | -1.05712896  |
| C    | -26.57087217       | -11.49390483 | -5.34936184  | O    | -33.41563716       | -9.62458046  | -4.26375638  |
| C    | -28.13898513       | -12.53567370 | -7.52465542  | H    | -29.11749269       | -8.43047935  | -4.51719941  |
| C    | -20.74281999       | -7.72866056  | -6.13468888  | H    | -25.56991809       | -10.13206478 | -0.25365962  |
| C    | -18.41228194       | -7.24554169  | -4.92235336  | H    | -27.43695342       | -7.36839096  | -0.29429980  |
| C    | -16.42669725       | -6.02819667  | -6.24436986  | H    | -22.80315366       | -6.56928983  | -1.39863366  |
| C    | -16.81759641       | -5.28158538  | -8.79157805  | H    | -24.88612604       | -5.62122753  | -3.84492037  |
| C    | -19.12597303       | -5.72571977  | -9.95653598  | H    | -22.00208573       | -10.61956971 | -3.61126952  |
| C    | -21.05652544       | -6.95862301  | -8.63001271  | H    | -25.68506558       | -13.07335919 | -4.30323955  |
| N    | -30.06128849       | -11.38235394 | -2.20022006  | H    | -29.61716236       | -13.79797993 | -6.82160271  |
| O    | -18.16796898       | -7.97067146  | -2.49887782  | H    | -29.04379798       | -10.99481374 | -8.56769386  |
| C    | -14.76064099       | -4.02977542  | -10.24388560 | H    | -26.92518408       | -13.59293643 | -8.82415752  |
| C    | -14.06140961       | -5.45045481  | -4.93908621  | H    | -19.38872239       | -5.13394312  | -11.90138683 |
| O    | -15.15988279       | -2.83792444  | -12.17268444 | H    | -22.84375433       | -7.36224913  | -9.54839592  |
| C    | -12.08756156       | -4.45352790  | -9.18554911  | H    | -29.52010059       | -12.58658613 | -0.81952701  |
| C    | -9.85811517        | -3.10163208  | -10.55169686 | H    | -16.43551727       | -7.48715286  | -1.95770549  |
| C    | -7.72990868        | -4.86063916  | -9.55421539  | H    | -5.60048218        | -4.86823519  | -5.93504051  |
| C    | -7.48449818        | -4.62444766  | -6.71805212  | H    | -9.29878879        | -4.06442746  | -3.19216807  |
| C    | -9.47262177        | -4.17360009  | -5.23525878  | H    | -9.81571004        | -5.58230275  | -16.66979474 |
| C    | -12.07271076       | -3.82772272  | -6.33173261  | H    | -12.72303484       | -0.72544176  | -4.37686068  |
| O    | -13.68410668       | -6.02476169  | -2.69860342  | H    | -7.90145947        | -10.77000914 | -10.60787872 |
| C    | -10.01534833       | -3.19768693  | -13.41428155 | H    | -8.70958315        | 0.48530267   | -14.42778445 |
| C    | -9.73230797        | -5.43305282  | -14.62398874 | H    | -10.50890763       | -1.02785203  | -16.82974101 |
| C    | -9.10852021        | -7.69915545  | -13.20736271 | H    | -12.03325594       | 0.24129096   | -14.11236343 |
| C    | -8.96315463        | -7.40449370  | -10.29917506 | H    | -4.36718799        | -5.94440425  | -10.46871010 |
| O    | -12.93873453       | -1.25458577  | -6.12262039  | H    | -35.70750745       | -13.64867811 | -2.29160693  |
| O    | -7.81275418        | -9.47848071  | -9.26932288  | H    | -33.35126460       | -14.14434064 | 0.06576122   |
| C    | -10.34462957       | -0.74372519  | -14.78895868 | H    | -35.40319050       | -11.48243362 | 0.22239693   |
| O    | -8.69071360        | -9.80059085  | -14.10071987 |      |                    |              |              |

**Table S7.** ECD calculation of conformer 3 of diastereomer **2B**.

Total energy = -1851.804047192

Kinetic energy = 1843.395474134

Potential energy = -3695.199521326

Parameters of Level DFT

DFT settings (Functional B3LYP / Gridsize M3)

Geometry optimization options (Energy  $10^{-6}$  Hartree, Gradient norm  $|dE / dx| = 10^{-3}$  Hartree/Bohr)Energy minimized coordinates of conformer 3 of diastereomer **2B** at the basis set def2-TZVP for all atoms(Å).

| Atom | Atomic coordinates |             |             | Atom | Atomic coordinates |             |             |
|------|--------------------|-------------|-------------|------|--------------------|-------------|-------------|
| C    | -28.100556         | -9.82102081 | -3.3555951  | O    | -5.39953377        | -4.38161795 | -10.7305696 |
| C    | -26.3768281        | -8.45635353 | -1.45683878 | H    | -9.75002334        | -1.13799783 | -10.0929008 |
| C    | -24.1981255        | -7.10066249 | -2.80658394 | O    | -11.5192924        | -7.09942382 | -9.29266702 |
| C    | -22.81848          | -8.95661157 | -4.57550946 | C    | -32.5705692        | -11.0847199 | -2.61910127 |
| O    | -24.5652825        | -10.0443811 | -6.30820988 | C    | -34.3202823        | -12.6658432 | -0.96809061 |
| C    | -26.5119176        | -11.5101035 | -5.14007896 | O    | -33.3787817        | -9.7630261  | -4.33809979 |
| C    | -28.036667         | -12.703171  | -7.26807855 | H    | -29.1064591        | -8.43759433 | -4.51882072 |
| C    | -20.7364473        | -7.70083402 | -6.0824643  | H    | -25.5900434        | -9.85023589 | -0.12379243 |
| C    | -18.4313394        | -7.09746842 | -4.87526413 | H    | -27.4952292        | -7.12022232 | -0.33581179 |
| C    | -16.4540765        | -5.92132542 | -6.24586184 | H    | -22.8631847        | -6.313298   | -1.4360442  |
| C    | -16.8259132        | -5.34179394 | -8.83919503 | H    | -24.9325538        | -5.53550707 | -3.95274951 |
| C    | -19.1098041        | -5.90410706 | -10.0015983 | H    | -21.9730863        | -10.4653116 | -3.41013532 |
| C    | -21.0331614        | -7.09135312 | -8.62389604 | H    | -25.6148055        | -13.0107613 | -3.99241248 |
| N    | -30.0480696        | -11.2605636 | -2.04492051 | H    | -29.499859         | -13.9502332 | -6.50888919 |
| O    | -18.2034181        | -7.6694661  | -2.40938214 | H    | -28.9581508        | -11.2422298 | -8.40699323 |
| C    | -14.7743478        | -4.1424489  | -10.3426394 | H    | -26.7890355        | -13.8107857 | -8.49145579 |
| C    | -14.1198288        | -5.21121871 | -4.94980195 | H    | -19.3587294        | -5.4391002  | -11.9823603 |
| O    | -15.1693594        | -3.08907175 | -12.3511881 | H    | -22.800448         | -7.58628984 | -9.53591756 |
| C    | -12.108332         | -4.43608624 | -9.22322209 | H    | -29.5166213        | -12.3532303 | -0.57101146 |
| C    | -9.89058335        | -3.1213287  | -10.6431842 | H    | -16.4880664        | -7.11805697 | -1.87859746 |
| C    | -7.73766686        | -4.76119201 | -9.5056709  | H    | -5.66257236        | -4.48584718 | -5.86510717 |
| C    | -7.53992957        | -4.33808344 | -6.68741622 | H    | -9.41967809        | -3.59701076 | -3.22976293 |
| C    | -9.55991355        | -3.8407443  | -5.26369552 | H    | -9.69924499        | -5.98944348 | -16.5874554 |
| C    | -12.1506589        | -3.62960129 | -6.41536021 | H    | -12.903916         | -0.4240705  | -4.67359153 |
| O    | -13.7594033        | -5.64107553 | -2.67448278 | H    | -7.75656071        | -10.7280419 | -10.1776056 |
| C    | -10.0027943        | -3.40555607 | -13.4959969 | H    | -8.76543484        | 0.23275426  | -14.7309008 |
| C    | -9.64966262        | -5.70673948 | -14.5546585 | H    | -10.4979548        | -1.47365986 | -17.0513098 |
| C    | -8.99352154        | -7.86086566 | -12.986317  | H    | -12.0869005        | -0.06615022 | -14.4412273 |
| C    | -8.90079614        | -7.37647108 | -10.1017756 | H    | -4.33757384        | -5.8208639  | -10.3032239 |
| O    | -13.080928         | -1.07051379 | -6.38401648 | H    | -35.7402026        | -11.4207154 | -0.12458125 |
| O    | -7.71932455        | -9.35166304 | -8.92389075 | H    | -35.3265249        | -14.0191443 | -2.16689247 |
| C    | -10.3679208        | -1.05404891 | -15.0314383 | H    | -33.350397         | -13.6993263 | 0.53961178  |
| O    | -8.51094838        | -10.00418   | -13.7363571 |      |                    |             |             |

**Figure S36.** The proposed polyketide cyclization patterns of (a) tandocyclinones and (b) angucyclinones.

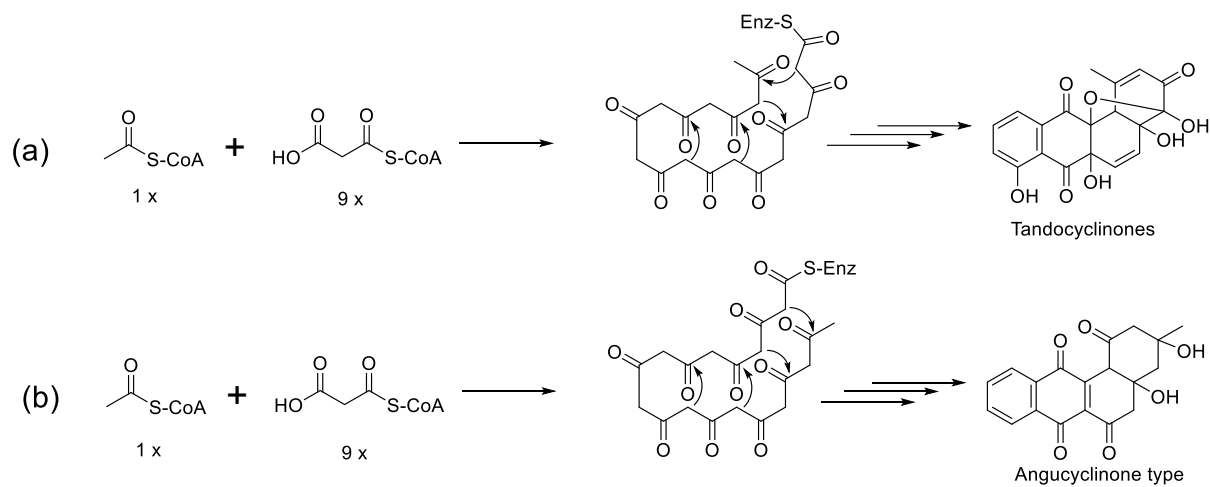

### Proposed biosynthetic pathways of tandocyclinones A and B (1 and 2)

The core structure of **1** and **2** could be biosynthesized by a common type II PKS. A set of type II polyketide synthase (PKS) catalyzes the condensation of an acetyl-CoA starter unit with 9 malonyl-CoA extender units to synthesize the linear backbone (i) via Claisen condensation. Then, intramolecular cyclization and aromatization could be achieved to afford the benz[*a*]anthracene ring (ii). This intermediate may have undergone a series of oxidation reactions at C-3, C-6a, and C-12 to yield intermediate iii. Subsequent nucleophilic attack of 12a-OH on carbonyl C-4 to give rise to the hemiacetal group at C-4 and ether bridged C-4–O–C-12 linkage (iv). The double bond between C-5 and C-6 is likely formed under reduction on carbonyl C-6 and later a loss of H<sub>2</sub>O to form v. As in the discussion in the manuscript, a known pyranonaphthoquinone BE-54238A with the involvement of a 4'-amino-4'-deoxy- $\alpha$ -D-amicetose ( $\alpha$ -d-forasmine) as the deoxyaminosugar biosynthetic precursor during C-glycosylation was also isolated from the same bacterial strain. Thus, intermediate v is proposed to be C-glycosylated by a glycotransferase at C-9 to generate tandocyclinone B (**2**). Tandocyclinone A (**1**) is rationally formed by an acetylation enzyme.

**Scheme S1.** Proposed biosynthetic pathways of tandocyclinones A and B (**1** and **2**)

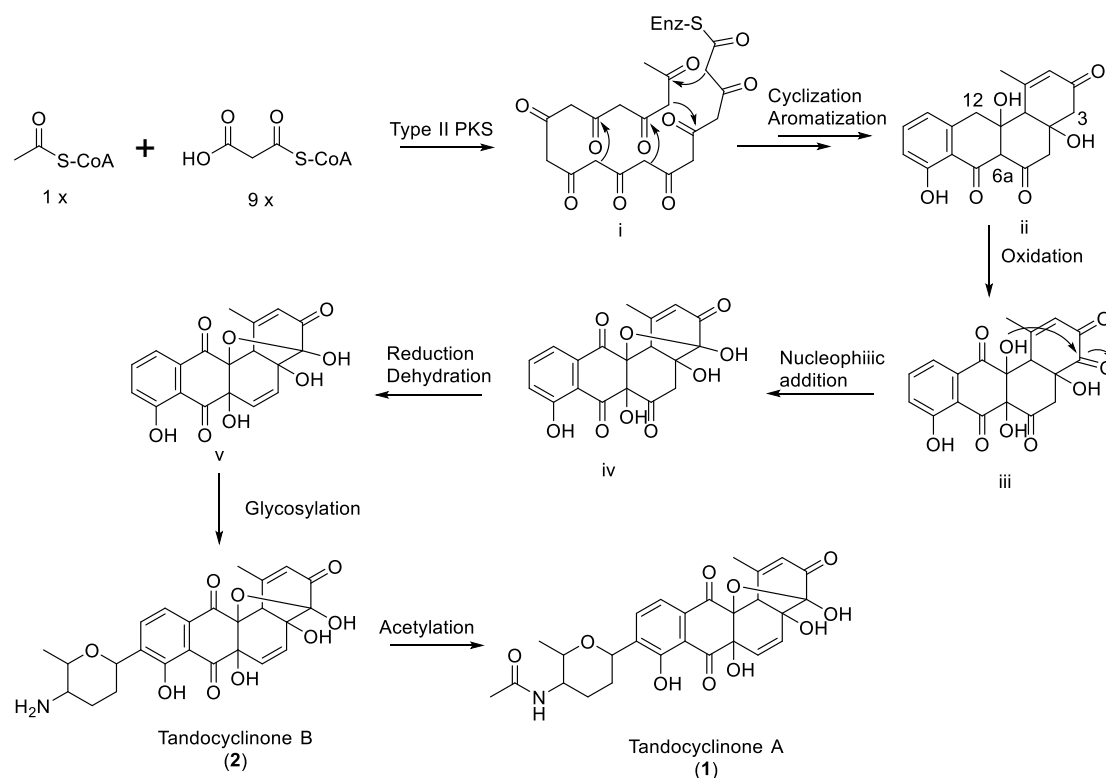

**Figure S37.**  $^1\text{H}$  NMR (600 MHz,  $\text{DMSO-}d_6$ ) and UV-vis (inset) spectra of BE-54238A (mass 397) from reference.

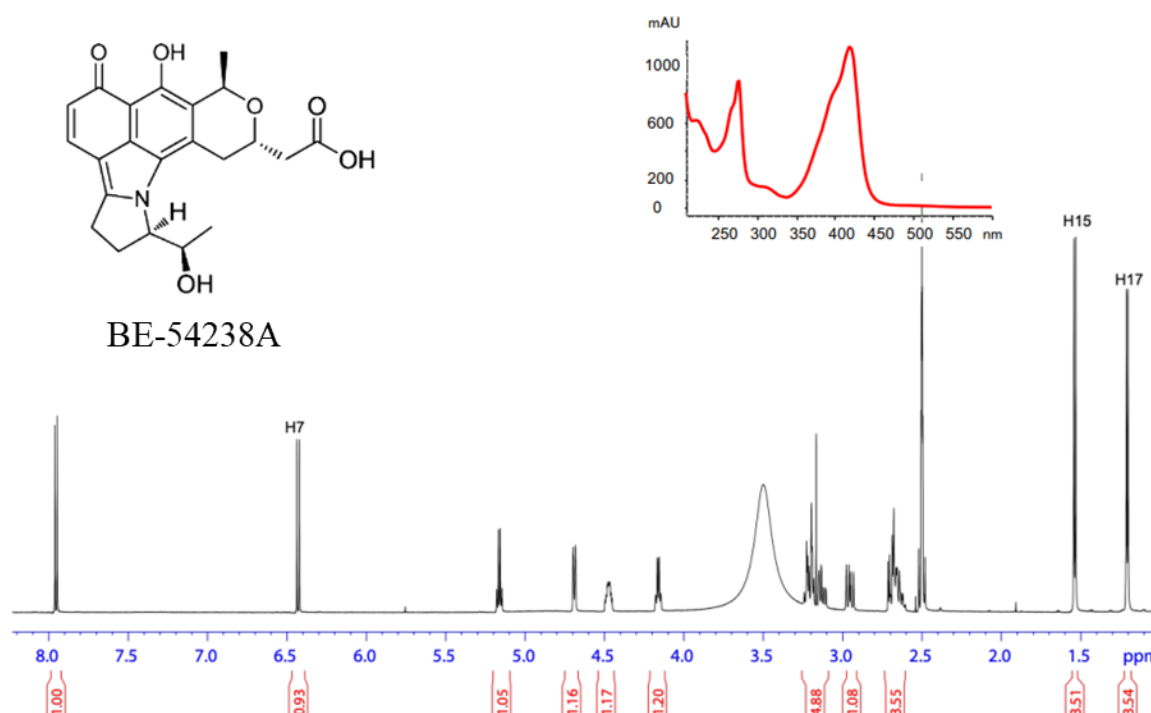

**Figure S38.**  $^1\text{H}$  NMR (800 MHz,  $\text{DMSO-}d_6$ ), UV-vis (inset) and MS (positive mode, inset) spectra of TDH03.397.

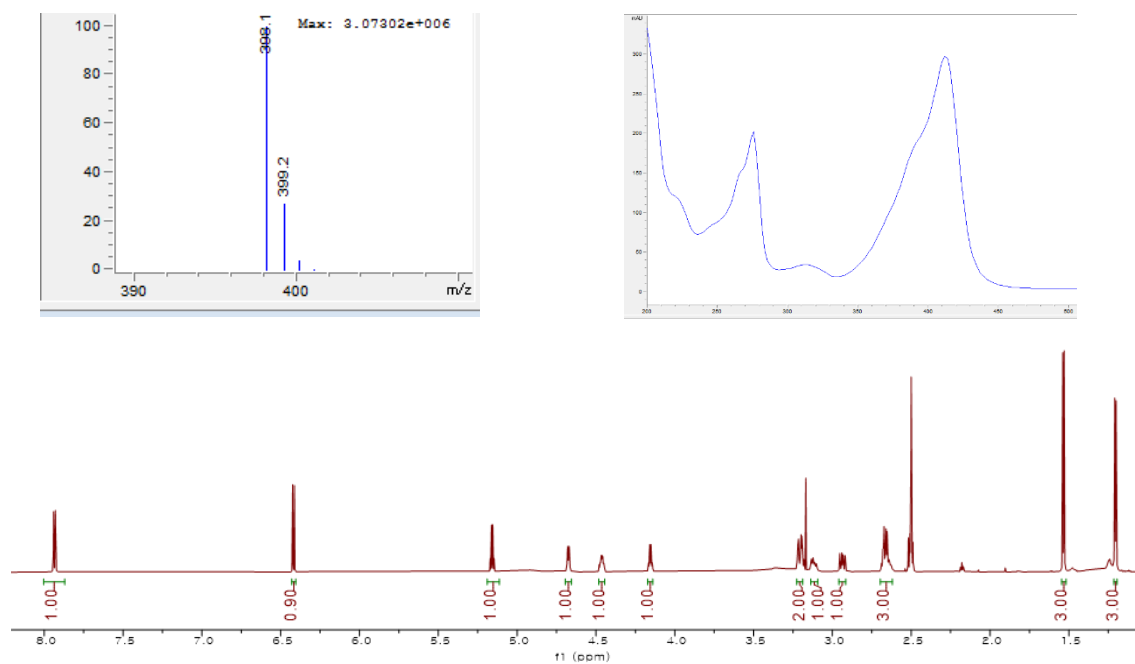

Supplement: s1 [file s1]
